1 Global identification of RsmA/N binding sites in *Pseudomonas aeruginosa* by *in vivo* UV CLIP-seq

2

3 Kotaro Chihara<sup>a,b\*</sup>, Lars Barquist<sup>c,d</sup>, Kenichi Takasugi<sup>a</sup>, Naohiro Noda<sup>a,b,#</sup>, Satoshi Tsuneda<sup>a#</sup>

4 <sup>a</sup>Department of Life Science and Medical Bioscience, Waseda University, Tokyo, Japan

5 <sup>b</sup>Biomedical Research Institute, National Institute of Advanced Industrial Science and Technology  
6 (AIST), Ibaraki, Japan

7 <sup>c</sup>Helmholtz Institute for RNA-based Infection Research (HIRI), Helmholtz Center for Infection Research  
8 (HZI), Würzburg, Germany

9 <sup>d</sup>Faculty of Medicine, University of Würzburg, Würzburg, Germany

10

11 Running Head: RsmA/N CLIP-seq in *P. aeruginosa*

12

13 #Address correspondence to Naohiro Noda, [noda-naohiro@aist.go.jp](mailto:noda-naohiro@aist.go.jp) or Satoshi Tsuneda,  
14 [stsuneda@waseda.jp](mailto:stsuneda@waseda.jp).

15 \* Present address: Helmholtz Institute for RNA-based Infection Research (HIRI), Helmholtz Center for  
16 Infection Research (HZI), Würzburg, Germany

17

18 Word count; 193 words (Abstract), 124 words (Importance), 4,849 words (Text exclusive of Material  
19 and Methods, References, or Figure legends)

20

21 **ABSTRACT**

22 Posttranscriptional regulation of gene expression in bacteria is performed by a complex and hierarchical  
23 signaling cascade. *Pseudomonas aeruginosa* harbors two redundant RNA-binding proteins RsmA/RsmN  
24 (RsmA/N), which play a critical role in balancing acute and chronic infections. However, *in vivo* binding  
25 sites on target transcripts and the overall impact on the physiology remains unclear. In this study, we  
26 applied *in vivo* UV crosslinking immunoprecipitation followed by RNA-sequencing (UV CLIP-seq) to  
27 detect RsmA/N binding sites at single-nucleotide resolution and mapped more than 500 peaks to  
28 approximately 400 genes directly bound by RsmA/N in *P. aeruginosa*. This also demonstrated the  
29 ANGGA sequence in apical loops skewed towards 5'UTRs as a consensus motif for RsmA/N binding.  
30 Genetic analysis combined with CLIP-seq results identified previously unrecognized RsmA/N targets  
31 involved in LPS modification. Moreover, the small non-coding RNAs RsmY/RsmZ, which sequester  
32 RsmA/N away from target mRNAs, are positively regulated by the RsmA/N-mediated translational  
33 repression of *hptB*, encoding a histidine phosphotransfer protein, and *cafA*, encoding a cytoplasmic axial  
34 filament protein, thus providing a possible mechanistic explanation for homeostasis of the Rsm system.  
35 Our findings present the global RsmA/N-RNA interaction network that exerts pleiotropic effects on gene  
36 expression in *P. aeruginosa*.

37

38 **IMPORTANCE**

39 The ubiquitous bacterium *Pseudomonas aeruginosa* is notorious as an opportunistic pathogen causing  
40 life-threatening acute and chronic infections in immunocompromised patients. *P. aeruginosa* infection  
41 processes are governed by two major gene regulatory systems, namely, the GacA/GacS (GacAS) two-  
42 component system and the RNA-binding proteins RsmA/RsmN (RsmA/N). RsmA/N basically function  
43 as a translational repressor or activator directly by competing with the ribosome. In this study, we

44 identified hundreds of RsmA/N regulatory target RNAs and the consensus motifs for RsmA/N bindings  
45 by UV crosslinking *in vivo*. Moreover, our CLIP-seq revealed that RsmA/N posttranscriptionally  
46 regulate cell wall organization and exert feedback control on GacAS-RsmA/N systems. Many genes  
47 including small regulatory RNAs identified in this study are attractive targets for further elucidating the  
48 regulatory mechanisms of RsmA/N in *P. aeruginosa*.

49

## 50 INTRODUCTION

51 The gram-negative bacterium *Pseudomonas aeruginosa* is an opportunistic pathogen infecting humans  
52 that thrives in diverse environments. It can cause serious biofilm-associated infections in burn wounds,  
53 indwelling devices, and the lungs of immunocompromised cystic fibrosis patients (1). The infection  
54 processes are governed via complex posttranscriptional regulatory mechanisms stimulated by certain  
55 environmental stresses such as nutrient starvation and antibiotic exposure (2). Such posttranscriptional  
56 control networks are typically composed of globally acting RNA-binding proteins (RBPs) together with  
57 small non-coding RNAs (sRNAs). Considering the presence of a large number of putative sRNAs and  
58 widely conserved RBPs in *P. aeruginosa*, a number of them might be incorporated into the regulatory  
59 networks for the processes.

60 Host factor protein for the replication of phage  $\phi$  (Hfq) is one of the most well-known RBPs  
61 that acts as an RNA chaperone and helps sRNAs basepair with target mRNAs for repression or  
62 activation of the translations (3). Similar to *Escherichia coli* or *Salmonella*, Hfq contributes to varied  
63 phenotypes such as quorum sensing, virulence, and antibiotic resistance in *P. aeruginosa* (4-6).  
64 Likewise, the RNA chaperone CsrA family, originally discovered as a carbon storage regulator in *E.*  
65 *coli*, also plays a global role in posttranscription in many bacteria (7). Unlike Hfq, the CsrA family  
66 functions by repressing translation directly by competing with the ribosome rather than acting as a

67 matchmaker between sRNA and mRNA in Gram-negative bacteria. CsrA family proteins bind to target  
68 RNAs via a stem-loop structure comprising an ANGGA motif. Conversely, translational suppression is  
69 inhibited by at least three sRNAs, namely, CrsB, CrsC, and McaS, each containing multiple GGA motifs  
70 in *E. coli* (8, 9).

71 *P. aeruginosa* has two CsrA homologs RsmA and RsmN (RsmA/N) and four redundant sRNAs  
72 RsmV, RsmW, RsmY, and RsmZ that function as antagonists of RsmA/N (10-12). RsmA and RsmN are  
73 structurally distinct with respect to the position of an  $\alpha$  helix constituent; RsmA is composed of five  
74 consecutive  $\beta$  sheets and a C-terminal  $\alpha$  helix whereas RsmN consists of an uniquely inserted  $\alpha$  helix  
75 between the  $\beta$ 2 and  $\beta$ 3 sheets (13). RsmA/N-titrating sRNAs, RsmY/RsmZ (RsmY/Z), are regulated by  
76 GacA/GacS (GacAS) two-component system. When the transmembrane histidine protein kinase (HPK)  
77 GacS is activated by environmental signals involved in the transition to the stationary phase, it  
78 phosphorylates its cognate response regulator GacA (14). Upon phosphorylation, GacA promotes the  
79 transcription of RsmY/Z (15). While RsmW is activated in the stationary phase or by high temperature  
80 (11), the level of RsmV expression is relatively low during the whole course of the growth, independent  
81 of GacAS activity (12). Both RsmA/N bind to some, but not all, common regulatory targets via a  
82 conserved arginine residue. Most of the known RsmA/N targets such as genes encoding for type VI  
83 secretion systems (T6SS) and exopolysaccharide biosynthesis are subject to direct translational  
84 repression (16, 17). In contrast, the genes encoding motility and type III secretion systems (T3SS) are  
85 positively regulated by RsmA/N (14, 18), thus modulating the transition between acute and chronic  
86 infections in *P. aeruginosa*.

87 These relationships between RsmA/N and target genes have been extensively investigated by  
88 phenotypic assays combined with genetic analysis *in vitro*. However, the complexity of *in vivo* RNA-  
89 based regulations makes attaining a comprehensive understanding of the mode of actions of RsmA/N

90 difficult. To address this, recent studies have identified target transcripts, that are bound by members of  
91 the CsrA/Rsm family via co-immunoprecipitation approaches (19, 20). Such methods can identify major  
92 RNA ligands. However, they do not provide sufficient information with respect to the RBPs binding  
93 sites within each transcript. Herein, we performed UV crosslinking immunoprecipitation followed by  
94 RNA-seq (UV CLIP-seq) with RsmA/N to identify their regulatory targets at a single-nucleotide  
95 resolution *in vivo*. Our approach found more than 500 potential binding sites genome-wide, which  
96 enabled us to gain new insights into the biological functions and the similarities and differences between  
97 the two redundant Rsm RBPs in *P. aeruginosa*.

98

## 99 **RESULTS**

### 100 **Transcriptome-wide mapping of RsmA/N binding sites**

101 As a preliminary investigation, western blotting analysis was performed using *P. aeruginosa* PAO1  
102 chromosomal FLAG tagged strains: *rsmA::3×FLAG*, *rsmN::3×FLAG*, and *rsmN::3×FLAGΔrsmA*. Here,  
103 we constructed a third strain as RsmA negatively regulates the translation of *rsmN* (21). When compared  
104 with *RsmA::3×FLAG* protein, *RsmN::3×FLAG* was not detected despite the deletion of translational  
105 repressor *rsmA* (Fig. S1A). Therefore, we expressed the *rsmN::3×FLAG* cassette from a multicopy  
106 plasmid in the PAO1 wild type strain. *RsmN* was successfully detected by western blot when the  
107 medium was supplemented with the arabinose inducer at 0.1% concentration (Fig. S1B). In the  
108 following procedure, chromosomally tagged *rsmA::3×FLAG* strain and plasmid-inducible  
109 *rsmN::3×FLAG* strain were incubated during the early stationary phase ( $OD_{600} = 2.0$ ) and UV irradiated  
110 to induce covalent bonds between RNAs and the corresponding proteins *in vivo*. Autoradiography and  
111 western blot analyses indicated that UV crosslinking and co-immunoprecipitation with anti-FLAG  
112 antibodies along with stringent washing enriched *RsmA*-RNA and *RsmN*-RNA complexes (Fig. 1A). It

113 should be noted that we omitted RNA radiolabeling steps and cut membranes from the regions  
114 consisting of RsmA/N bands up to the region 50 kDa above for RNA purification (Fig. 1B).

115 Purified RNAs from crosslinked and non-crosslinked samples in triplicates were reverse  
116 transcribed into cDNA and subjected to Illumina sequencing. By performing a comparative analysis of  
117 called peaks from RsmA/N-binding regions between crosslinked and non-crosslinked libraries using  
118 DESeq2, we detected hundreds of binding sites with significant enrichment (false discovery rate (FDR)  
119  $< 0.05$  and minimum expression = 1.0) throughout the *P. aeruginosa* transcriptome (Fig. 1C). We  
120 identified 75 overlapping peaks between RsmA and RsmN, with overlapping peaks defined as the peaks  
121 that exhibited both the start and stop positions within 40 nt of each other, thus constituting 69  
122 overlapping genes (Fig. 1D). Since this CLIP-seq was carried out in conditions similar to the previously  
123 performed Hfq CLIP-seq (22), the genes that overlapped between RsmA/N and Hfq were also  
124 investigated. A total of 25 genes including the genes encoding outer membrane proteins were common  
125 among all three RNA chaperones (Fig. S2A). Gebhardt et al. recently performed chromatin  
126 immunoprecipitation with cells grown in the presence or absence of rifampicin followed by high-  
127 throughput DNA sequencing (ChIPPAR-seq) for *P. aeruginosa* RsmA to capture a subset of nascent  
128 transcripts (20). When compared with the list of transcripts that are regulated co-transcriptionally by  
129 RsmA, approximately 25% of RsmA-binding genes were also detected in our CLIP-seq (Fig. S2B). In  
130 addition, Romero et al. mapped more than 500 transcripts directly bound by RsmN using RNA  
131 immunoprecipitation and sequencing (RIP-seq) (19). We observed that a limited number of RsmN-  
132 binding genes were detected in both our CLIP-seq and the RIP-seq (Fig. S2C).

133 Finally, significant peaks were classified on the basis of RNA classes using previously generated  
134 UTR annotation list (22-24) and manually curated *P. aeruginosa* sRNA lists (25-27). Most of the peaks  
135 were mapped within mRNAs, in which more than 40% of the binding sites in CDSes overlapped with

136 the first quarter of the CDSes (Fig. 1E and Fig. S3A). Interestingly, approximately half of ncRNAs  
137 bound by RsmA were annotated as *cis*-antisense RNAs (asRNAs) (Fig. S3B), suggesting that certain  
138 posttranscriptional regulatory mechanisms attributed to RsmA and asRNAs are still unrecognized.  
139 Taken together, RsmA/N CLIP-seq analysis identified hundreds of binding sites associated with each  
140 RNA chaperone.

141

### 142 **Similarities and differences in sequence and structural motifs bound by RsmA/N**

143 RsmA/N bind to conserved GGA sequences within or close to Shine-Dalgarno sequences of target  
144 mRNAs (18). More precisely, parallel systematic evolution of ligands by exponential enrichment  
145 (SELEX) studies for RsmA/N have identified a common consensus motif CANGGAYG positioned in a  
146 hexaloop region of the stem-loop structure (28). To understand the consensus sequence bound by  
147 RsmA/N and its position in the target transcripts *in vivo*, the peak density of RsmA/N peaks across all  
148 detected mRNAs was determined via meta-gene analysis using start or stop codons as reference points.  
149 Strong peak densities were observed around start codons but not around stop codons, showing that *P.*  
150 *aeruginosa* RsmA/N preferentially bind to the 5' UTRs of mRNAs (Fig. 2A). Next, sequence motifs for  
151 RsmA/N bindings were determined using all detected RsmA/N binding sequences by MEME motif  
152 analysis. Top-ranked motifs of both RsmA/N contained the ANGGA sequence (Fig. 2B). All RsmA  
153 binding sites exhibited the motif. In fact, more than 80% of detected RsmA/N peaks demonstrated at  
154 least one minimal GGA motif and the second nucleotide of ANGGA sequence for RsmA binding  
155 showed a preference for uracil (Fig. 2C). Unlike RsmA, the second nucleotide position of the ANGGA  
156 sequence for RsmN binding is more tolerant, accepting any nucleotides except for guanine (Fig. 2B and  
157 C). In order to understand whether the detected motifs were likely to be present in the apical loop, all  
158 detected RsmA/N binding sequences were subjected to CMfinder structural motif analysis. The top-

159 ranked structural motifs from CMfinder were predicted as highly conserved stem-loop with the GGA  
160 sequence in the loop regions (Fig. 2D). Interestingly, the top-ranked structural motif for RsmN binding  
161 demonstrated two stem-loops with GGA sequences adjacent to each other, consistent with the previous  
162 report showing that RsmN requires two binding sites of the known target *tssA1* (28). Therefore, the  
163 number of GGA sequences per peak was searched to evaluate whether RsmN requires two adjacent  
164 GGA sequences for high-affinity binding. Although we expected that RsmN might tend to bind peaks  
165 corresponding to more than two GGA motifs, no significant difference was observed between RsmA and  
166 RsmN (Fig. 2E). Altogether, RsmA/N CLIP-seq demonstrates ANGGA in loop regions as a general  
167 recognition sequence/structural motif, which is in clear accordance with previously published works.  
168

### 169 **RsmA/N CLIP-seq expands global binding targets in *P. aeruginosa***

170 When the small non-coding RNAs RsmY/Z are highly expressed, RsmA/N are titrated away from target  
171 RNAs playing an important role in the regulation of virulence factors associated with acute and chronic  
172 infections. The results of RsmA/N CLIP-seq conducted in this study demonstrate that the read coverage  
173 of RsmY/Z was highest among all other genes (Fig. 3A and Table S1). RsmY/Z exhibit multiple GGA  
174 motif sites for RsmA/N binding and RsmA/N peak sites corresponded to their GGA motifs (Fig. 3B),  
175 whereas Hfq predominantly associated with their Rho-independent terminators (29). Our data also  
176 shows that RsmA/N indeed bind to well-known target mRNAs. For examples, high CLIP-seq coverages  
177 were found at the 5'UTR of the gene *tssA1* encoding structural component of the Hcp secretion island-I-  
178 encoded T6SS and 5'UTR of the gene *mucA* encoding anti-sigma factor (Fig. 3C). The RsmA/N-binding  
179 sites detected on these mRNAs fold into hairpins with GGA motifs (Fig. 3D). Collectively, the data  
180 suggests that RsmA/N CLIP-seq was able to capture the *bona fide* RsmA/N binding sites.



181 To determine the biological processes in which RsmA/N-binding RNAs were enriched, DAVID  
182 enrichment analysis was performed for mRNAs containing peaks, with a modified Fisher's exact *p*-  
183 value threshold < 0.1. Genes associated with cell wall organization, including those involved in the  
184 polysaccharide biosynthetic process, O-antigen biosynthetic process, and lipopolysaccharide (LPS)  
185 biosynthetic process were enriched (Fig. 4A). Among the cell wall organization processes, high peak  
186 density was detected within the *wbp* gene cluster involved in O5 O-antigen biosynthesis (Fig. 4B). Since  
187 the category represents an unknown role for RsmA/N, we decided to explore them in more detail.

188 The *wbp* gene cluster consists of three genes responsible for the assembly of the O-antigen (*wzx*,  
189 *wzy*, and *wzz*), twelve genes involved in the biosynthesis assembly of the nucleotide sugars of the O unit  
190 (*wbpABCDEFGHIJKLM*), three insertion genes encoding putative transposase and integrase (PA3142–  
191 PA3144) between *wbpL* and *wbpM*, and two non-LPS-related genes (*hisF2* and *hisH2*) between *wbpG*  
192 and *wzx* (30). Significant peaks indicating RsmA binding were observed in *wzz*, *wbpA*, *wbpB*, *hisH2*,  
193 *hisF2*, *wbpG*, *wbpH*, *wbpL*, and *wbpM* genes whereas those indicating RsmN binding were observed in  
194 *wbpA*, *wbpE*, *wbpI*, and *wbpM* genes (Fig. 4C). We verified the function with respect to RsmA/N-  
195 mediated gene regulation against *wzz*, *wbpA*, *wbpE*, *wbpG*, *wbpH* and *wbpM* using super-folder GFP  
196 (sfGFP) translational fusion assay. When compared with the wild type,  $\Delta$ *rsmA/N* strain expressed  
197 significantly high GFP fluorescence in *wzz*, *wbpA*, *wbpE*, and *wbpG* translational fusions, suggesting  
198 that RsmA/N posttranscriptionally repress the translation of each gene (Fig. 4D). Altogether, our  
199 RsmA/N CLIP-seq results reveal new RsmA/N regulatory targets associated with LPS modification.

200

### 201 **Homeostasis of RsmY/Z expressions by an RsmA/N-controlled feedback loop**

202 The expression of RsmA/N-titrating sRNAs RsmY/Z is activated by GacAS two-component system  
203 (15). The GacAS system is controlled by three additional HPKs: RetS, PA1611, and LadS. In addition to

204 these complex regulatory pathways, RsmY and RsmZ are independently regulated by the histidine  
205 phosphotransfer protein HptB and cytoplasmic axial filament protein CafA, respectively. Expression of  
206 *hptB* is regulated by additional membrane-binding proteins SagS and ErcS (31), whereas the *cafA*  
207 expression is under the control of another two-component system BfiR/BfiS (32). Among those proteins  
208 involved in the homeostasis of RsmY/Z expression, we observed RsmA/N binding peaks in the *sagS*,  
209 *gacS*, *ladS*, *hptB*, and *cafA* genes (Fig. 5A). Since HptB is the decision hub for RsmY activation via the  
210 phosphorylation of additional regulatory components HsbA/HsbD and flagellar gene expression via  
211 FlgM sequestration (33), we focused on RsmA/N-mediated *hptB* gene regulation. We also investigated  
212 whether RsmA/N directly regulated *cafA* gene expression since CafA specifically represses RsmZ  
213 expression with its endoribonucleolytic activity.

214 We observed RsmA/N binding peaks in both coding DNA sequences although only RsmN  
215 binding was statistically significant (Fig. 5B). Therefore, we performed the sfGFP translational fusion  
216 assay to understand the RsmA/N associated gene regulation of *hptB* and *cafA*. When compared with the  
217 wild type,  $\Delta rsmA/N$  strain expressed significantly high GFP fluorescence in both translational fusions  
218 (Fig. 5C). In order to investigate whether both RsmA and RsmN repress the *hptB* and *cafA* translations,  
219 RsmA and RsmN were exogenously expressed from multicopy plasmid pJN105 in  $\Delta rsmA/N$  background  
220 and GFP fluorescence was measured. When compared with pJN105 vector control, both RsmA/N were  
221 capable of repressing GFP fluorescence (Fig. 5D). If *hptB* expression is negatively regulated by  
222 RsmA/N, downstream HptB-dependent secretion and biofilm anti anti-sigma factor HsbA should be  
223 phosphorylated and diguanylate cyclase HsbD should activate RsmY expression. Additionally, if *cafA*  
224 expression is negatively regulated by RsmA/N, degradation of RsmZ by CafA should be alleviated. To  
225 confirm these, RsmY/Z abundance between the wild type and  $\Delta rsmA/N$  strains was quantified by qRT-

226 PCR. As expected, RsmY/Z were significantly reduced in the  $\Delta rsmAN$  strain (Fig. 5E), suggesting that  
227 RsmY/Z expressions were balanced by RsmA/N-controlled feedback loop.

228

### 229 **RsmA/N bind to multiple sRNAs other than RsmY/Z in *P. aeruginosa***

230 Besides RsmY/Z, we observed high read coverage for RsmA/N bindings and significant enrichment of  
231 crosslinked samples in several sRNAs. For example, SPA0035 sRNA, a transcript from the minus strand  
232 of the intergenic region between *ada* and PA2119, was significantly bound to RsmA/N, but not to Hfq  
233 (Fig. 6A, left). As another example, the PAO1-specific asRNA SPA0066 transcribed from the opposite  
234 strand of PA3993 was also significantly bound to RsmA/N, but not to Hfq (Fig. 6A, middle). It should  
235 be noted that SPA0066 overlapped in the antisense orientation of the 5' UTR of a gene encoding a  
236 putative transposase of the IS116/IS110/IS902 family. This transposase family exists in six genomic  
237 positions in PAO1, all of which demonstrate identical asRNAs (SPA0004–8 and SPA0066). The  
238 SPA0079 sRNA, a transcript from the minus strand of the intergenic region comprising 1,011 nt  
239 between PA2763 and PA2764, was significantly bound to RsmA/N, as well as to Hfq (Fig. 6A, right and  
240 Fig. S4A). The majority of these sRNAs carry GGA motifs and many corresponding peaks fold into  
241 hairpins (Fig. 6B).

242 Among the RsmA/N-binding sRNAs detected in our CLIP-seq, SPA0079 exhibited significant  
243 binding to both Hfq and RsmA/N and demonstrated high coverage next to RsmY/Z (see y-axis in Fig.  
244 6A and Table S1). Subsequently, we investigated its characteristics as an RsmA/N-binding sRNA in  
245 next section.

246

### 247 **SPA0079 sRNA does not sequester RsmA/N away from target mRNAs under our conditions**

248 We first determined the SPA0079 boundaries by 5'/3' RACE analysis. RNA pyrophosphohydrolase  
249 RppH treatment followed by PCR amplification selectively enriched 5' terminus with triphosphate ends  
250 of SPA0079 (the band indicated by a red arrow in Fig. S4B). The 3' terminus of SPA0079 corresponded  
251 to the canonical U repeats of the rho-independent terminator (Fig. S4A). The SPA0079 secondary  
252 structure predicted by Mfold (34) exhibited only a single stem-loop, having a strong resemblance to a  
253 rho-independent transcription terminator (Fig. S4C). The expression of SPA0079 in the wild type and  
254 the deletion mutant were measured throughout the course of growth (Fig. S4D). The maximal level of  
255 the SPA0079 expression was reached in the late stationary phase at the OD<sub>600</sub> of 6.0 in the wild type  
256 (Fig. S4D, lanes 1–5). In contrast, SPA0079 sRNA level was undetectable in the  $\Delta$ SPA0079 mutant  
257 strain (Fig. S4D, lane 6).

258 A previous study has suggested that two quorum sensing (QS) pathways LasI/LasR and  
259 RhII/RhlR might be related to the expression of SPA0079 (35). Furthermore, the DNA sequence of the  
260 upstream of -35 promoter motif was similar to the consensus motif of LasR/RhlR binding (Fig. S4A). To  
261 investigate QS-dependent SPA0079 expression, northern blotting analysis was performed with  
262  $\Delta$ *lasI* $\Delta$ *rhII* double mutant strain with or without the exogenous supplementation of two acyl homoserine  
263 lactones (AHLs) 3OC<sub>12</sub>-HSL and C<sub>4</sub>-HSL. SPA0079 displayed strict dependence on QS as it  
264 accumulated within 1 h after AHLs were added (Fig. S5A). Additionally, SPA0079 was not detectable  
265 in a  $\Delta$ *lasI* strain, whereas it was detected moderately in a  $\Delta$ *rhII* strain (Fig. S5B). Taken together with  
266 the published report (35), these results suggest that the expression of SPA0079 is controlled by the QS  
267 systems. Another previous report showed that Hfq stabilizes RsmY by blocking the cleavage by RNase  
268 E (29). We investigated whether Hfq might affect SPA0079. Northern blotting showed no difference in  
269 the SPA0079 levels in a  $\Delta$ *hfq* mutant compared to its levels in wild type and  $\Delta$ *rsmA/N* mutant (Fig.  
270 S5C).

271 To investigate whether SPA0079 indeed titrates RsmA/N away from the mRNA target, the  
272 activity of sfGFP fused with 5' UTR and CDS of *cafA* was assayed with or without SPA0079  
273 overexpression. Although we speculated that a *cafA*::sfGFP fusion would be repressed by the induction  
274 of SPA0079, no clear difference was observed in GFP activity in the SPA0079 overexpression state  
275 compared to that in the  $\Delta rsmA/N$  mutant strain (Fig. S5D). Considering that the level of SPA0079  
276 expression reaches maximum in the late stationary phase (Fig. S4D), and that RsmY/Z predominantly  
277 bind to RsmA/N under the conditions in which CLIP-seq was performed, it may be that SPA0079 sRNA  
278 competes or complements RsmY/Z under specific conditions not captured in our assay. Future studies  
279 are required to determine whether or not SPA0079 is a functional RsmA/N antagonist.

280

## 281 **DISCUSSION**

282 Two conserved and redundant RBPs RsmA/N play a critical role in balancing acute and chronic  
283 infections in *P. aeruginosa*. So far, the interactions of RsmA/N with target RNAs have been extensively  
284 explored *in vitro*. However, it is prudent to understand the mode of actions in the complex  
285 transcriptional networks *in vivo*. Many studies using advanced technologies based on high-throughput  
286 sequencing have now provided the global regulatory functions of RBPs depending on the physiological  
287 states of a cell (36-38). In this study, we performed the RsmA/N CLIP-seq analysis and demonstrated  
288 more than 500 genome-wide RsmA/N binding sites. Many genes identified in this study could be  
289 attractive targets for further elucidating the regulatory mechanisms of RsmA/N in *P. aeruginosa*.

290 As the prerequisite for this study, we first checked RsmA and RsmN abundance at an  $OD_{600} =$   
291 2.0. It is well known that the transcript encoding RsmN is posttranscriptionally repressed by RsmA and  
292 the protein abundance is relatively low compared to RsmA during the growth period (21). Therefore, we  
293 speculated that RsmN-binding RNAs are likely captured in the  $\Delta rsmA$  background. However, the

294 abundance of RsmN is still low even in the  $\Delta rsmA$  background and interacting RNAs cannot be captured  
295 by co-immunoprecipitation (Fig. S1). The low RsmN abundance may be attributed to its original low  
296 transcription rate in the condition where our CLIP-seq was conducted. A previous study has shown that  
297 the level of *rsmN* expression reaches maximum in the late stationary phase (39). Although we relied on  
298 the exogenous expression of RsmN from multicopy plasmid and performed RsmA/N CLIP-seq at an  
299  $OD_{600} = 2.0$  in order to compare previously performed Hfq CLIP-seq result (22), it would be possible to  
300 detect RsmN-binding positions using the chromosomally tagged strain at the later growth phase, which  
301 should be addressed in further experiments.

302 In the widespread application of the current CLIP-seq procedure, radioactive labeling of  
303 crosslinked RNAs and visualization of the autoradiograph are common. As with several non-radioactive  
304 CLIP methods (40-43), herein, we omitted labor-intensive use of radioactive substances and successfully  
305 captured specifically interacting RNAs (Fig. 1B to E). When compared with previously published data,  
306 RsmA/N-binding genes demonstrated in this study were relatively low in number (Fig. S2). This  
307 variation may be attributed to the differences in the experimental setup. RsmA ChIPPAR-seq captures  
308 nascent transcript at mid-log phase and significant binding positions are defined as enrichment in the  
309 minus rifampicin library compared with the plus rifampicin library (20). RsmN RIP-seq is performed  
310 during the late stationary phase and significant binding genes are defined using enrichment index  
311 generated by comparison of co-immunoprecipitation library with total RNA library (19). In addition, the  
312 small overlap of detected genes with previous reports perhaps derives from the limitations of  
313 bioinformatics analysis. Our CLIP-seq approach relies on the comparison between crosslinking and non-  
314 crosslinking libraries. Hence, this approach identifies the binding sites with significant enrichment in  
315 crosslinking samples. The analysis perhaps missed the *bona fide* RsmA/N binding sites with high-  
316 affinity in non-crosslinking libraries. Especially in our RsmA CLIP-seq, the background likely has much

317 higher counts than that specific to the crosslinking libraries, which might be the artifact of one or two  
318 highly expressed transcripts such as RsmY and RsmZ (Fig. 3A and Fig. S6). Nevertheless, numerous  
319 known targets of RsmA/N were observed from our CLIP-seq (Fig. 1). As examples, we showed high  
320 CLIP-seq coverages observed at the 5'UTRs of the mRNAs *tssA1* and *mucA* and sRNAs RsmY/Z,  
321 leading to the identification of their RsmA/N-binding sites *in vivo* at a single-nucleotide resolution (Fig.  
322 3).

323 Interestingly, approximately half of RsmA-binding ncRNAs were annotated as asRNAs (Fig.  
324 S3B). Although no report exists demonstrating the promotion of the complex formation between  
325 regulatory RNAs and their target mRNAs in Gram-negative bacteria by the CsrA family, *Bacillus*  
326 *subtilis* CsrA helps SR1 sRNA basepair with *ahrC* mRNA, affecting the expression of its downstream  
327 genes (44). Rather than the CsrA family, ProQ/FinO-domain proteins and Hfq are generally thought to  
328 be responsible for the interaction between mRNAs and asRNAs in Gram-negative bacteria (45). The *E.*  
329 *coli* F plasmid-encoded FinO promotes the association of F plasmid-encoded mRNA *traJ* with asRNAs  
330 FinP (46). The chromosomally encoded ProQ from *Salmonella* also promotes the association of mRNA  
331 with asRNAs including Type I Toxin-Antitoxin system (47, 48), although ProQ can also play a similar  
332 role in Hfq acting as a matchmaker between *trans*-encoded sRNAs and mRNAs (49). Hfq primarily  
333 promotes the basepairing between *trans*-encoded sRNAs and mRNAs. However, it also facilitates  
334 antisense pairing such as in IS10 system, where asRNA RNA-OUT interacts with RNA-IN encoding  
335 transposase to occlude the ribosome binding site (50). Since we found that asRNAs SPA0004–0008 and  
336 SPA0066 transcribed from the opposite strands of genes encoding putative transposases associate with  
337 RsmA/N (Fig. 6A, middle), it should be interesting to investigate whether these asRNAs may regulate  
338 the opposite genes via RsmA/N binding similar to Hfq, RNA-IN, and RNA-OUT in *E. coli*.

339 The advantage of CLIP-seq is to detect protein binding sites on the transcript at a single-  
340 nucleotide resolution. This approach has demonstrated sequence/structural binding motifs of the CsrA  
341 family in *E. coli* and *Salmonella* (37, 38). Herein, we investigated the similarities and differences  
342 between *P. aeruginosa* RsmA and RsmN on the basis of sequence/structural motifs and a typical  
343 distribution of the detected peaks (Fig. 2). The results of the peak distribution among mRNAs were  
344 common between the two RBPs, indicating that RsmA/N peaks are highly enriched at only 5' UTRs,  
345 which is consistent with the previous reports (19, 51) (Fig. 2A to D). In addition, sequence and structural  
346 motif analyses demonstrated that the stem-loop structure with the ANGGA sequence in its loop region is  
347 primary of RsmA/N bindings. Interestingly, although all of the RsmA peaks detected in this study  
348 include the ANGGA motif, RsmN peaks seem to be under looser definition of its binding motif than  
349 RsmA (see the number of detected peaks in Fig. 2B). From the perspective of molecular basis, RsmA  
350 homolog RsmE in *Pseudomonas fluorescens* CHA0 needs the looped out nucleotide base N in ANGGA  
351 motif and basepairing in the stem for rigid binding through Leu55 to Ala57 in the C-terminal  $\alpha$  helix as  
352 well as the correct stacking (52). In contrast,  $\alpha$  helix in RsmN is located within the internalized  $\beta$ 2 and  
353  $\beta$ 3 sheets, constituting the hydrophobic core that acts as a potential new RNA binding site (13). Thus,  
354 RsmN may bind with a more flexible loop motif independent of C-terminal  $\alpha$  helix even without obvious  
355 ANGGA sequence. Interestingly, the structural motif of RsmN peaks consisted of two tandem stem-loop  
356 structures with GGA motifs (Fig. 2D). Consistent with this, *in vitro* SELEX study and mutational  
357 analysis have demonstrated long RsmA/N targets with two consensus GGA motifs, and both of the two  
358 tandem GGA sites are required only for RsmN binding (28). Overall, our CLIP-seq analysis combined  
359 with previous reports suggested a unique two-sidedness of RsmN binding; tandem stem-loop structures  
360 with two GGAs or flexible sequences without obvious ANGGA sequence.



361 Further genetic analysis has elucidated new regulatory targets of RsmA/N involved in O5 O-  
362 antigen biosynthesis (Fig. 4). The three genes *wzx*, *wzy*, and *wzz* are responsible for the assembly of the  
363 O-antigen and other genes *wbpABCDEFGHIJKLM* are involved in the biosynthesis assembly of the  
364 nucleotide sugars of the O unit (30). Since we observed RsmA bindings to both *wzz* and *wzz2* encoding  
365 O-antigen chain length regulators and validated the RsmA/N-mediated translational repression of *wzz*  
366 (Fig. 4D and Table S1), active posttranscriptional regulation through RsmA/N would lead to LPS-rough  
367 phenotype, which is often observed in *P. aeruginosa* isolates from chronic pulmonary infections (53,  
368 54). In a recent study, the low levels of *wzz2* expression led to the conversion to mucoid phenotype with  
369 alginate production, and a transcriptional factor AmrZ negatively regulated the expression (55). Under  
370 the same AlgU regulon with AmrZ, AlgR activates alginate production and in turn, directly stimulates  
371 RsmA expression (56). This might accelerate the modulation of O-antigen length and eventually the  
372 biofilm formation (57). The translational repression of genes involved in O-antigen biosynthesis through  
373 RsmA/N is also consistent with the findings demonstrating that the absence of B-band O-antigen is  
374 correlated with the increase of T3SS-mediated cytotoxicity that is activated by RsmA/N directly (58).  
375 Taking into account the previous ChIP-seq analysis showing that T3SS master regulator ExsA binds to  
376 promoter sequences of *wbpA* and *wbpH* (59), the *wbp* gene cluster is likely to be under the both  
377 transcriptional and translational regulation mediated by RsmA/N.

378 Free RsmA/N and the level of the titrating sRNAs are controlled through homeostatic regulation.  
379 Although it was previously shown that RsmA exerts a positive effect on RsmY and RsmZ transcription  
380 in *P. aeruginosa* and *Pseudomonas protegens* (60, 61), the mechanisms underlying the positive feedback  
381 loop remain unclear. In this study, *hptB* encoding the histidine phosphotransfer protein and *cafA*  
382 encoding the cytoplasmic axial filament protein were identified as novel RsmA/N regulatory targets  
383 (Fig. 5). When RsmA/N repress the translation of *hptB*, RsmY expression would be stimulated via the

384 phosphorylation of HsbA and the subsequent activation of HsbD (31). In addition to RsmY, when the  
385 *cafA* is repressed in the RsmA/N-dependent manner, RsmZ would escape from degradation owing to the  
386 endoribonucleolytic activity (32), thus constituting three repressors feedback loop. In a simple and  
387 synthetic gene circuit, however, the three repressors loop periodically induces the synthesis of output  
388 (62). Since RsmY/Z expression increases throughout the growth period (15), other factors might be  
389 involved in the homeostatic regulations of RsmY/Z. For example, polynucleotide phosphorylase PNPase  
390 regulates the stabilities of RsmY/Z (63). Our CLIP-seq data has identified RsmA binding to the gene  
391 encoding PNPase (Table S1), which infers that RsmA affects RsmY/Z through the availability of  
392 PNPase.

393 Finally, we discovered 41 RsmA/N-binding sRNAs besides known RsmA/N-titrating sRNAs  
394 (Fig. 6 and Table S1). Among them, SPA0079 was highly enriched in both Hfq and RsmA/N CLIP-seq,  
395 motivating us to further investigate its properties. The level of SPA0079 expression reached maximum  
396 in late stationary phase and was undetectable in  $\Delta lasI\Delta rhII$  mutant, whereas exogenous supplementation  
397 of two AHLs complimented the expression (Fig. S4 and S5), strongly supporting the fact that SPA0079  
398 is regulated by two QS pathways (35). Although we expected that SPA0079 could alleviate RsmA/N-  
399 mediated translational repression, no clear activation of translational fusion activity was observed with  
400 the SPA0079 sRNA overexpression (Fig. S5D). Given that RsmY/Z predominantly bind to RsmA/N  
401 under the conditions in which CLIP-seq was performed and the effect of SPA0079 is negligible, future  
402 studies should be performed using  $\Delta rsmY/Z$  mutant to determine whether or not the SPA0079 sRNA are  
403 indeed RsmA/N antagonist. A recent paper shows that sRNA179 (also annotated as SPA0034)  
404 expression stimulates RsmY transcription (64). Additionally, the expression of sRNA179 is activated by  
405 QS similar to SPA0079 (35). Considering these observations, QS might suppress the RsmA/N

406 regulatory system through two different posttranscriptional pathways, highlighting the complexity of  
407 Rsm regulatory systems.

408

## 409 **METHODS**

### 410 **Strains, plasmids, and growth conditions**

411 Strains, plasmids and oligonucleotides used herein are enlisted in Table S2. All experiments were  
412 performed using *P. aeruginosa* PAO1 or its derived strains. Each strain was cultured at 37°C in Luria-  
413 Bertani (LB) medium. Samples were collected at the OD<sub>600</sub> values indicated in the figures. Where  
414 indicated, the appropriate AHLs were added at the following final concentrations: C<sub>4</sub>-HSL (Cayman  
415 Chemicals) at 10 µM and 3OC<sub>12</sub>-HSL (RTI International) at 2 µM. Antibiotics and arabinose were used  
416 as needed at concentrations listed as follows. For *Pseudomonas*, gentamicin, tetracycline, and arabinose  
417 at concentrations 50 µg/ml, 80 µg/ml, and 0.1%, respectively, were used. Similarly, for *E. coli*,  
418 gentamicin and tetracycline at concentrations 10 µg/ml and 20 µg/ml, respectively, were used.

419

### 420 **Strain construction**

421 *P. aeruginosa* PAO1  $\Delta rsmA$ ,  $\Delta rsmN$ ,  $\Delta rsmA/N$  double mutant,  $\Delta lasI$ ,  $\Delta rhII$ ,  $\Delta lasI\Delta rhII$  double mutant,  
422 and  $\Delta SPA0079$  strains were constructed based on the conjugative transfer of appropriate plasmids and  
423 homologous recombination between chromosome and plasmids as described previously (65). The  
424 plasmids for the homologous recombination of  $\Delta rsmA$ ,  $\Delta rsmN$ , and  $\Delta rsmA/N$  double mutant were  
425 constructed by HindIII/XbaI cloning of PCR products 500 bp upstream and 500 bp downstream of CDS  
426 of each gene from PAO1 chromosome into pG19II backbone (66). The plasmids for the homologous  
427 recombination of  $\Delta lasI$ ,  $\Delta rhII$ ,  $\Delta lasI\Delta rhII$  double mutant, and  $\Delta SPA0079$  were constructed by  
428 HindIII/BamHI cloning of PCR products 500 bp upstream and 500 bp downstream of CDS of each gene

429 from PAO1 chromosome into pG19II backbone (66). pG19*rsmA*::3×FLAG and pG19*rsmN*::3×FLAG  
430 were constructed by cloning PCR products at HindIII/XbaI sites 500 bp upstream of the *rsmA/N* stop  
431 codon in the PAO1 chromosome, 3×FLAG tag, 500 bp downstream of the *rsmA/N* stop codon in the  
432 PAO1 chromosome into the pG19II backbone.

433

#### 434 **UV crosslinking, immunoprecipitation, and RNA purification**

435 Bacterial cultures with volume 200 ml of three replicates were maintained up to an OD<sub>600</sub> of 2.0 in LB  
436 medium. For RsmN expression from the multicopy plasmid, 0.1% arabinose was added at an OD<sub>600</sub> of  
437 0.8. UV crosslinking and immunoprecipitation were performed in accordance with the previously  
438 published protocol with minor modifications (22). Briefly, half of the culture at an OD<sub>600</sub> of 2.0 from  
439 each condition was irradiated at 800 mJ of UV light at 254 nm. After UV crosslinking, the sample was  
440 centrifuged at 3,600 rpm for 30 min at 4°C along with the non-crosslinked control samples.

441 Cell pellets were lysed in FastPrep 24 (MP-Biomedicals) at 6 m/s for 1 min with 1 ml of 0.1-mm  
442 glass beads and 800 µl NP-T buffer (50 mM NaH<sub>2</sub>PO<sub>4</sub>, 300 mM NaCl, 0.05% Tween20, pH 8.0). NP-T  
443 supplemented with 8 M urea was added to each supernatant at an equal volume and incubated for 5 min  
444 at 65°C with shaking at 900 rpm. Anti-FLAG magnetic beads were washed thrice with 500 µl NP-T  
445 buffer, resuspended in 125 µl NP-T buffer, and treated with a 120-µl suspension of urea-treated samples.  
446 After 1 h of incubation at 4°C, samples were washed twice with 500 µl high-salt buffer (50 mM  
447 NaH<sub>2</sub>PO<sub>4</sub>, 1M NaCl, 0.05% Tween20, pH 8.0), followed by two washes with 500 µl NP-T buffer. Beads  
448 were resuspended in benzonase mix [500 units benzonase nuclease (E1014, Sigma-Aldrich) in NP-T  
449 buffer with 1 mM MgCl<sub>2</sub>] and incubated for 10 min at 37°C with shaking at 900 rpm. After one wash  
450 with high-salt buffer and two washes with CIP buffer (100 mM NaCl, 50 mM Tris-HCl, pH 7.4, 10 mM

451 MgCl<sub>2</sub>), beads were resuspended in 200 µl CIP mix (20 units of calf intestinal alkaline phosphatase  
452 (M0290, NEB) in CIP buffer) and incubated for 30 min at 37°C with shaking at 800 rpm.

453 Here, radioactive isotope (RI) labeling was performed only in the preliminary investigation to  
454 check whether UV crosslinking did enrich RNA-protein complex (Fig. 1A). After one wash with high-  
455 salt buffer and two washes with PNK buffer (50 mM Tris-HCl, pH 7.4, 10 mM MgCl<sub>2</sub>, 0.1 mM  
456 spermidine), beads were resuspended in 200 µl PNK buffer and separated into 20 µl and 180 µl volumes  
457 to be used subsequently for western blotting and RI labeling, respectively. For RI labeling, beads were  
458 magnetized and resuspended in 100 µl PNK mix [10 units of T4 polynucleotide kinase (EK0032,  
459 ThermoFisher Scientific), 10 µCi γ-<sup>32</sup>P-ATP in PNK buffer]) and incubated for 30 min at 37°C,  
460 following the addition of 1 µl 10 mM non-radioactive ATP and incubation for 5 min at 37°C. After two  
461 washes with NP-T buffer, beads were resuspended in 25 µl 2xProtein loading buffer and incubated for 5  
462 min at 95°C. Beads were magnetized and supernatants were transferred to fresh tubes. The elution was  
463 repeated twice. For western blotting, 20 µl separated beads were washed twice with 100 µl NP-T buffer  
464 and resuspended in 10 µl 2xProtein loading buffer and incubated for 5 min at 95°C. Beads were  
465 magnetized and supernatants were transferred to fresh tubes. The elution was repeated twice.

466 In the CLIP experiments for RNA purification and cDNA preparation, RI labeling was not used  
467 (Fig. 1B). After CIP reaction, beads were resuspended in 100 µl PNK mix [10 units of T4  
468 polynucleotide kinase (EK0032, ThermoFisher Scientific), 1µl 10 mM non-radioactive ATP in PNK  
469 buffer] and incubated for 30 min at 37°C, followed by addition of 1 µl 10 mM non-radioactive ATP and  
470 incubation for 5 min at 37°C. After two washes with NP-T buffer, beads were resuspended in 30 µl  
471 2xProtein loading buffer and incubated for 5 min at 95°C. Beads were magnetized and supernatants  
472 were transferred to fresh tubes. The elution was repeated twice.

473 Aliquots of 55  $\mu$ l were loaded and separated via SDS-polyacrylamide gel electrophoresis (12%  
474 resolving gel) at 30 mA while moving through the stacking gel, which was then increased to 40 mA.  
475 After RNA electrophoresis, the RNA was transferred from the gel to the Protran membrane (#10600016,  
476 GE Healthcare). The membrane was placed on a clean glass surface and cut from the prestained protein  
477 markers to 50 kDa above them. Each membrane piece was cut into smaller pieces and placed in 2 ml  
478 fresh tubes with 400  $\mu$ l PK solution [1.3 mg/ml Proteinase K (EO0491, ThermoFisher Scientific), and 10  
479 units of RNase inhibitor (#10777019, Invitrogen) in 2xPK buffer (100 mM Tris-HCl, pH 7.9, 10 mM  
480 EDTA, 1% SDS)], followed by incubation for 1 h at 37°C with shaking at 1,000 rpm. The samples were  
481 subsequently incubated with 100  $\mu$ l PK buffer containing 9 M urea for 1 h at 37°C with shaking at 1,000  
482 rpm. Thereafter, 450  $\mu$ l of supernatants from proteinase K-treated membranes were mixed with an equal  
483 volume of phenol:chloroform:isoamyl alcohol in phase-lock gel tubes and incubated for 5 min at 30°C  
484 with shaking at 1,000 rpm. Each mixture was centrifuged for 12 min at 13,000 rpm at 4°C, and 400  $\mu$ l of  
485 the aqueous phase was precipitated with 3 volumes of ice-cold ethanol, 1/30 volume of 3 M NaOAc (pH  
486 5.2), and 1  $\mu$ l of GlycoBlue (AM9515, Invitrogen) for 2 h at -20°C. The precipitated pellet was washed  
487 with 80% ethanol, briefly dried for 5 min at 20°C, and resuspended in 11  $\mu$ l of sterilized water.

488

#### 489 **cDNA library preparation and sequencing**

490 A cDNA library of the CLIP samples was prepared using the NEBNext Multiplex Small RNA Library  
491 Prep Set for Illumina (#E7300, NEB) in accordance with the manufacturer's instructions. RT primer and  
492 both 3'/5' SR adapters were diluted 10-fold with nuclease-free water before use. cDNA was converted  
493 from 2.5  $\mu$ l of each purified RNA. Reverse-transcribed cDNAs were amplified by 20 cycles PCR. PCR  
494 products were concentrated to 10  $\mu$ l using the MinElute PCR Purification kit and separated by 6%  
495 polyacrylamide gel with 7 M urea. Bands between 130 bp and 250 bp were cut and purified from the gel

496 in accordance with the manufacturer's instructions. Purified cDNAs of 5 µl volume were amplified by 6  
497 cycles PCR and concentrated to 10 µl using the MinElute PCR Purification kit. Final cDNA libraries  
498 were quantified using the Qubit dsDNA assay (Q32854, Invitrogen) and Agilent 2100 Bioanalyzer DNA  
499 HS (Agilent). Twelve cDNA libraries from CLIP were pooled on an Illumina HiSeq2500 and sequenced  
500 in paired-end mode (2 × 50 cycles).

### 501 502 **Sequence processing, mapping, normalization, and peak calling**

503 To assure high sequence quality, read 1 (R1) and read 2 (R2) files containing the Illumina paired-end  
504 reads in FASTQ format were quality and adapter-trimmed by Cutadapt (67) version 1.15/1.16 using a  
505 cut-off Phred score of 20. Reads without any remaining bases were discarded (command line  
506 parameters: -q 20 -m 1 -a AGATCGGAAGAGCACACGTCTGAACTCCAGTCAC -A  
507 GATCGTCGGACTGTAGAACTCTGAACGTGTAGATCTCGGTGGTCGCCGTATCATT). To  
508 eliminate putative PCR duplicates, paired-end reads were collapsed using FastUniq (68) After trimming,  
509 we applied the pipeline READemption (69) version 0.4.5 to align all reads longer than 11 nt to the *P.*  
510 *aeruginosa* PAO1 chromosome (NCBI accession no. NC\_002516.2) reference genome using segemehl  
511 (70) version 0.2.0 with accuracy cut-off of 80%.

512 Read counts per position were analyzed using reads that mapped uniquely to single genomic  
513 position. The core of positions present in crosslinked and non-crosslinked library pairs were isolated, as  
514 described previously (71). Positions with low read counts were filtered from both crosslinked and non-  
515 crosslinked libraries using 10 standard deviations from 0 as a threshold. After plotting the difference in  
516 read counts between the two libraries as shown in Fig. S6, the size factor was calculated using the  
517 DESeq normalization procedure from the high-count positions in both libraries across all replicates (72).

518 We applied PEAKachu v0.1.0 (<https://github.com/tbischler/PEAKachu>) for the peak calling  
519 similar to the previously described protocol (71). First, BAM files for the respective pairs of crosslinked  
520 and non-crosslinked libraries were used to run in paired-end (-P) and paired-replicates (-r) mode. The  
521 maximum fragment size (-M) was set to 50 and annotations generated as GFF format were used to map  
522 overlapping features to the called peaks. Normalization was performed in the “manual” mode using  
523 previously determined size factors (see above). Other parameters were set to default. Second, the  
524 boundary of initial peaks was set through block definition computed by the blockbuster algorithm (73)  
525 based on pooled read alignments from all crosslinked libraries using default parameters. Third, the  
526 PEAKachu tool ran the DESeq2 package (74) to analyze the significance of peak enrichment in the  
527 crosslinked libraries relative to the non-crosslinked libraries with parameter values as follows: mad-  
528 multiplier (-m) 1.0, fold change (-f) 1.0, and adjusted *p*-value (-Q) 0.05. Finally, PEAKachu was used  
529 for each replicon and strand to generate normalized coverage plots to facilitate data visualization.

530

### 531 **Analysis of sequence and structural motifs**

532 The sequences of peaks were used to perform MEME sequence motif analysis (75). Minimum and  
533 maximum motif widths were set at 6 and 50, respectively, while other parameters were set to default.  
534 Structural motifs of the sequences of peak regions extended by an additional 10 nt upstream and  
535 downstream were analyzed using CMfinder 0.2.1 (76). The minimum length of single stem-loop  
536 candidates was set to 20, while other parameters were set to default. Each analyzed motif was visualized  
537 using R2R (77).

538

### 539 **Statistical and other analysis**



540 Descriptive statistical analyses for peak and gene overlapping between RsmA and RsmN, peak  
541 distributions across the *P. aeruginosa* genome, and peak classification among RNA classes were  
542 performed using Microsoft Excel. Meta-gene analyses across detected mRNAs or the *P. aeruginosa*  
543 genome were performed with in-house script using Python3. Genes identified via CLIP-seq analysis  
544 were functionally characterized using the PseudoCAP annotation (<http://www.pseudomonas.com>).  
545 KEGG enrichment analysis was performed for mRNAs identified via CLIP-seq analysis using DAVID  
546 (<https://david.ncifcrf.gov/summary.jsp>). Default parameters and databases were used for the analysis.

547

#### 548 **Construction of translational fusion plasmids**

549 The sequence containing the first 186 amino acids of LacZ (LacZ186) and the super-folder GFP (sfGFP)  
550 open reading frame (78) expressed by J23119 constitutive promoter was obtained from ThermoFisher  
551 Scientific. LacZ186 was flanked by a NsiI and a SphI site while sfGFP was flanked by a SphI and an  
552 XbaI site. The synthetic sequence was cloned into inversely amplified pSW002-Pc PCR product by  
553 infusion cloning (Takara, Z9633N). pSW002-Pc was a gift from Rosemarie Wilton (Addgene plasmid #  
554 108234) (79). The region from TSSes to downstream of the start codon in target RNAs was amplified  
555 with 15 bp complemented sequences on 5' and 3' end, respectively. The resulting PCR products were  
556 cloned into a NsiI/SphI digested pSW-*lacZ*::sfGFP backbone by infusion cloning (Takara, Z9633N).

557

#### 558 **Translational fusion assay**

559 *P. aeruginosa* wild type and  $\Delta$ *rsmA/N* strains carrying the sfGFP translational fusions were grown  
560 overnight in 1 ml LB medium with 80  $\mu$ g/ml tetracycline at 37°C. An aliquot with 2  $\mu$ l volume was  
561 resuspended in 200  $\mu$ l LB medium with 80  $\mu$ g/ml tetracycline and transferred to black polystyrene 96-  
562 well microplates with a clear, flat bottom (Corning). The medium was additionally supplemented with

563 gentamicin with concentration 50 µg/ml and 0.1% arabinose for RsmA/N and SPA0079 expression from  
564 multicopy plasmids. Fluorescence polarization (FP<sub>476/510</sub>) was measured with SpectraMax GeminiXS  
565 (Molecular Devices) every 15 min for 6 h at 37°C with agitation for 1 min before fluorescence  
566 measurement. The fluorescent cutoff was set to 495 nm. Thereafter, the final optical density (OD) of  
567 each culture was obtained by GeneQuant 1300 (Biochrom). GFP activity was expressed in arbitrary  
568 units as FP<sub>476/510</sub>/OD<sub>600</sub>.

569

### 570 **qRT-PCR**

571 Total RNA was extracted by the hot phenol extraction method followed by DNase treatment. cDNAs  
572 from 1 µg DNase-treated purified RNA were obtained using PrimeScript™ RT Master Mix (#RR036A,  
573 TAKARA) following the manufacturer's instruction. qRT-PCR was performed for triplicates. Reactions  
574 were performed in a total volume of 20 µl containing 10 µl of TB Green Fast qPCR Mix (#RR430A,  
575 TAKARA), 0.4 µl of ROX reference dye II, 0.8 µl of each primer (10 µM), 7 µl of RNase-free water and  
576 1 µl of template DNA. PCR and fluorescence measurements were performed using the viiA7 (Applied  
577 Biosystems) with the following program; preheating at 95°C for 30 s, followed by 40 cycles of  
578 denaturation at 95°C for 5 s and annealing at 60°C for 20 s. The gene *rpoD* was used as an internal  
579 standard (80). Relative gene expression was calculated using the  $\Delta\Delta C_t$  method (81).

580

### 581 **5' and 3' rapid amplification of cDNA ends (RACE)**

582 5' and 3' RACE assays were performed as previously described with some modifications (82). For 5'  
583 RACE assay, 15 µg of DNA-depleted RNA was incubated with 12.5 units of RNA 5'  
584 pyrophosphohydrolase (RppH) (#M0356, NEB) in a 50 µl reaction for 1 h at 37°C. The same volume of  
585 RNA without the RppH reaction was prepared to be used as a negative control. After incubation, RppH-

586 reacted and control RNAs were purified and 1.25  $\mu$ M 5'RACE adaptor (5'-GAU AUG CGC GAA UUC  
587 CUG UAG AAC GAA CAC UAG AAG AAA-3') was mixed. The samples were denatured at 95°C for  
588 5 min. The adaptor was ligated using T4 RNA Ligase 1 overnight at 16°C. The adaptor-ligated RNA  
589 was purified, annealed with gene-specific primer and reverse-transcribed using AffinityScript Multiple  
590 Temperature Reverse Transcriptase (#600107, Agilent) with following conditions; 42°C for 20 min,  
591 55°C for 20 min and 70°C for 15 min in a 20  $\mu$ l reaction. One-micro-liter of reverse-transcribed cDNA  
592 was amplified by nested PCR with a total volume of 50  $\mu$ l containing 0.4  $\mu$ M of 5'adaptor-specific  
593 primer, 0.4  $\mu$ M of 1<sup>st</sup> round gene-specific primer, 200  $\mu$ M of each dNTP, 1x PCR buffer, and 1.25 units  
594 of TaKaRa Taq HS (#R007A, TAKARA). Second PCR was performed with a total volume of 50  $\mu$ l  
595 containing 1  $\mu$ l of PCR product obtained after the first round, 0.4  $\mu$ M of 5'adaptor-specific primer, 0.4  
596  $\mu$ M of 2<sup>nd</sup> round gene-specific primer, 200  $\mu$ M of each dNTP, 1x PCR buffer, and 1.25 units of TaKaRa  
597 Taq HS (#R007A, TAKARA). Following conditions were used for both PCRs: preheating at 95°C for 3  
598 min, followed by 30 cycles of denaturation at 94°C for 30 s, annealing at 56°C for 30 s, extension at  
599 72°C for 30 s, and then final extension at 72°C for 7 min.

600 For 3' RACE assay, 15  $\mu$ g of DNA-depleted RNA was incubated with 25 units of calf intestinal  
601 alkaline phosphatase (CIP) (#M0290, NEB) in a 50  $\mu$ l reaction volume for 1 h at 37°C. After incubation,  
602 RNA reacted with CIP was purified and 1.25  $\mu$ M 3'RACE adaptor (5'-phosphate-UUC ACU GUU  
603 CUU AGC GGC CGC AUG CUC-idT -3') was mixed. The samples were denatured at 95°C for 5 min.  
604 The adaptor was ligated overnight using T4 RNA Ligase 1 at 17°C. The adaptor-ligated RNA was  
605 purified, annealed with gene-specific primer and reverse-transcribed using AffinityScript Multiple  
606 Temperature Reverse Transcriptase (#600107, Agilent) with following conditions; 42°C for 20 min,  
607 55°C for 20 min and 70°C for 15 min in a 20  $\mu$ l reaction. Reverse-transcribed cDNA of 1  $\mu$ l was  
608 amplified by PCR in a total volume of 50  $\mu$ l containing 0.4  $\mu$ M of 3'adaptor-specific primer, 0.4  $\mu$ M of

609 gene-specific primer, 200  $\mu$ M of each dNTP, 1x PCR buffer, and 1.25 units of TaKaRa Taq HS  
610 (#R007A, TAKARA). The PCR was conducted as follows: preheating at 95°C for 3 min, followed by 30  
611 cycles of denaturation at 94°C for 30 s, annealing at 56°C for 30 s, extension at 72°C for 30 s, and then  
612 final extension at 72°C for 7 min.

613 PCR products were separated on 4% NuSieve GTG agarose gel, the band of interest was cut, gel-  
614 eluted, and cloned into a BamHI/HindIII digested pUC19. Bacterial colonies obtained after the  
615 transformation were screened by colony PCR. The PCR fragments were purified by QIAquick PCR  
616 purification kit and sequenced with an ABI Genetic analyzer 3500 (Applied Biosystems).

617

#### 618 **Northern blotting**

619 Purified RNA of 10  $\mu$ g was denatured at 95°C for 5 min in gel loading buffer II (#AM8547, Invitrogen)  
620 and separated by 6% polyacrylamide gel with 7M urea at 300 V for 2 h. Separated RNA was electro-  
621 transferred from the gel to Hybond-N+ membranes (GE Healthcare) at 50 V for 1 h at 4°C and the  
622 membranes were UV-crosslinked (120 mJ/cm<sup>2</sup>). Northern blotting was performed with the Roche DIG  
623 system. DNA probes for 5S rRNA and SPA0079 were amplified with PCR using primers described in  
624 Table S2 and PCR DIG Probe Synthesis Kit (#11636090910, Roche). The reaction was performed with  
625 a total volume of 50  $\mu$ l containing 0.2  $\mu$ M of forward primer, 0.2  $\mu$ M of reverse primer, 200  $\mu$ M of  
626 dATP, dCTP, and dGTP, 130  $\mu$ M of dTTP, 70  $\mu$ M of DIG-11-dUTP, 1x PCR buffer, and 2.625 units of  
627 Enzyme mix, Expand High Fidelity (#1732641, Roche). The PCR conditions were set as follows:  
628 preheating at 95°C for 2 min, followed by 30 cycles of denaturation at 95°C for 30 s, annealing at 60°C  
629 for 30 s, extension at 72°C for 40 s and then final extension at 72°C for 7 min.

630 UV-crosslinked membranes were prehybridized with 10 ml of DIG EasyHyb for 30 min at 50°C.  
631 Thereafter, DIG-labelled DNA probes were hybridized overnight at 50°C in 15 ml of DIG EasyHyb.

632 Membranes were washed every 15 min in 5×Saline Sodium Citrate (SSC)/0.1% SDS, 1×SSC/0.1% SDS  
633 and 0.5× SSC/0.1% SDS buffers at 50°C followed by washing with maleic acid buffer (0.1 M maleic  
634 acid, 0.15 M NaCl, 0.3% Tween-20 pH 7.5) for 5 min at 37°C. Thereafter, membranes were blocked  
635 with blocking solution (#11585762001, Roche) for 45 min at 37°C, and probed with 75 mU/ml Anti-  
636 Digoxigenin-AP (#11093274001, Roche) in blocking solution for 45 min at 37°C. Membranes were then  
637 washed again in maleic acid wash buffer in two 15-min steps and equilibrated with detection buffer (0.1  
638 M Tris–HCl, 0.1 M NaCl, pH 9.5). Signals were visualized by CDP-star (#12041677001, Roche) with  
639 Fusion Fx Imaging System (Vilber-Lourmat).

640

#### 641 **Western blotting**

642 One-hundred bacterial cultures at OD<sub>600</sub> = 2.0 were centrifuged at 10,000 rpm for 2 min at 22°C and  
643 resuspended in 100 µl 1xProtein loading buffer, followed by incubation for 5 min at 95°C. Aliquots of 5  
644 µl were separated on 10% TGX gel (Bio-Rad) and subsequently transferred onto a polyvinylidene  
645 difluoride (PVDF) membrane using a Transblot Turbo Transfer System (Bio-Rad).

646 For the CLIP procedure, 5 µl aliquots of heat-denatured immunoprecipitated RNA-protein  
647 complex were loaded and separated via SDS-polyacrylamide gel electrophoresis (12% resolving gel) at  
648 30 mA per gel while moving through the stacking gel, which was then increased to 40 mA. After  
649 electrophoresis, proteins were electro-transferred onto a PVDF membrane.

650 Transferred membranes were blocked in 1xTBS-T buffer (20 mM Tris, 150 mM NaCl, 0.1%  
651 Tween20, pH 7.6) with 10% skim milk for 45 min. Thereafter, the membrane was probed overnight at  
652 4°C with monoclonal α-FLAG (#31430, ThermoFisher Scientific; 1:10,000) antibody diluted in 1×TBS-  
653 T buffer containing 3% bovine serum albumin, washed thrice for 5 min each in 1×TBS-T buffer, probed  
654 for 1 h with anti-mouse-HRP-antibody (F1804, Sigma-Aldrich; 1:50,000) diluted in 1×TBS-T buffer

655 containing 3% bovine serum albumin, and washed thrice for 5 min each in 1×TBS-T buffer.  
656 Chemiluminescent signals were detected using Immobilon Western Chemiluminescent HRP substrate  
657 (#WBKLS0500, Millipore) and measured with Fusion Fx Imaging System (Vilber-Lourmat).

658

#### 659 **Data availability**

660 Raw sequence data are available in the DDBJ Sequenced Read Archive under the accession number  
661 DRA010307.

662

#### 663 **ACKNOWLEDGEMENTS**

664 We thank Akiko Yokota and Tetsushi Suyama for their assistance with the registration of this  
665 study in AIST. We also thank Thorsten Bischler for his help with CLIP-seq analysis and Jörg Vogel for  
666 his helpful comments on this study.

667 This study was supported by Grant-in-Aid for JSPS Research Fellow Grant Number 17J10663.  
668 The sequencing of CLIP-seq libraries was supported by the JSPS KAKENHI Grant Number 16H06279  
669 (PAGS).

670 K.C. designed study, performed experiments and data analysis, acquired funding, and wrote  
671 manuscript. L.B. performed data analysis and participated in manuscript writing. K.T. performed  
672 experiments. N.N and S.T. participated in manuscript writing and supervision.

673

#### 674 **REFERENCES**

675 1. Mulcahy LR, Isabella VM, Lewis K. 2014. *Pseudomonas aeruginosa* Biofilms in Disease.  
676 *Microbial Ecology* 68:1-12.

- 677 2. Holmqvist E, Wagner EGH. 2017. Impact of bacterial sRNAs in stress responses. *Biochem Soc*  
678 *Trans* 45:1203-1212.
- 679 3. Chao Y, Vogel J. 2010. The role of Hfq in bacterial pathogens. *Curr Opin Microbiol* 13:24-33.
- 680 4. Sonnleitner E, Hagens S, Rosenau F, Wilhelm S, Habel A, Jäger KE, Bläsi U. 2003. Reduced  
681 virulence of a *hfq* mutant of *Pseudomonas aeruginosa* O1. *Microbial Pathogenesis* 35:217-228.
- 682 5. Sonnleitner E, Schuster M, Sorger-Domenigg T, Greenberg EP, Blasi U. 2006. Hfq-dependent  
683 alterations of the transcriptome profile and effects on quorum sensing in *Pseudomonas*  
684 *aeruginosa*. *Mol Microbiol* 59:1542-1558.
- 685 6. Pusic P, Sonnleitner E, Krennmayr B, Heitzinger DA, Wolfinger MT, Resch A, Bläsi U. 2018.  
686 Harnessing metabolic regulation to increase Hfq-dependent antibiotic susceptibility in  
687 *Pseudomonas aeruginosa*. *Front Microbiol* 9:2709.
- 688 7. Romeo T, Gong M, Liu MY, Brun-Zinkernagel AM. 1993. Identification and molecular  
689 characterization of *csrA*, a pleiotropic gene from *Escherichia coli* that affects glycogen  
690 biosynthesis, gluconeogenesis, cell size, and surface properties. *J Bacteriol* 175:4744-4755.
- 691 8. Babitzke P, Romeo T. 2007. CsrB sRNA family: sequestration of RNA-binding regulatory  
692 proteins. *Curr Opin Microbiol* 10:156-163.
- 693 9. Holmqvist E, Vogel J. 2013. A small RNA serving both the Hfq and CsrA regulons. *Genes Dev*  
694 27:1073-1078.
- 695 10. Kay E, Humair B, Denervaud V, Riedel K, Spahr S, Eberl L, Valverde C, Haas D. 2006. Two  
696 GacA-dependent small RNAs modulate the quorum-sensing response in *Pseudomonas*  
697 *aeruginosa*. *J Bacteriol* 188:6026-6033.

- 698 11. Miller CL, Romero M, Karna SL, Chen T, Heeb S, Leung KP. 2016. RsmW, *Pseudomonas*  
699 *aeruginosa* small non-coding RsmA-binding RNA upregulated in biofilm versus planktonic  
700 growth conditions. BMC Microbiol 16:155.
- 701 12. Janssen KH, Diaz MR, Gode CJ, Wolfgang MC, Yahr TL. 2018. RsmV, a small noncoding  
702 regulatory RNA in *Pseudomonas aeruginosa* that sequesters RsmA and RsmF from target  
703 mRNAs. J Bacteriol 200:e00277-18.
- 704 13. Morris ER, Hall G, Li C, Heeb S, Kulkarni RV, Lovelock L, Silistre H, Messina M, Camara M,  
705 Emsley J, Williams P, Searle MS. 2013. Structural rearrangement in an RsmA/CsrA ortholog of  
706 *Pseudomonas aeruginosa* creates a dimeric RNA-binding protein, RsmN. Structure 21:1659-  
707 1671.
- 708 14. Goodman AL, Merighi M, Hyodo M, Ventre I, Filloux A, Lory S. 2009. Direct interaction  
709 between sensor kinase proteins mediates acute and chronic disease phenotypes in a bacterial  
710 pathogen. Genes Dev 23:249-259.
- 711 15. Brencic A, McFarland KA, McManus HR, Castang S, Mogno I, Dove SL, Lory S. 2009. The  
712 GacS/GacA signal transduction system of *Pseudomonas aeruginosa* acts exclusively through its  
713 control over the transcription of the RsmY and RsmZ regulatory small RNAs. Mol Microbiol  
714 73:434-445.
- 715 16. Irie Y, Starkey M, Edwards AN, Wozniak DJ, Romeo T, Parsek MR. 2010. *Pseudomonas*  
716 *aeruginosa* biofilm matrix polysaccharide Psl is regulated transcriptionally by RpoS and post-  
717 transcriptionally by RsmA. Mol Microbiol 78:158-172.
- 718 17. Allsopp LP, Wood TE, Howard SA, Maggiorelli F, Nolan LM, Wettstadt S, Filloux A. 2017.  
719 RsmA and AmrZ orchestrate the assembly of all three type VI secretion systems in *Pseudomonas*  
720 *aeruginosa*. Proc Natl Acad Sci U S A 114:7707-7712.



- 721 18. Heurlier K, Williams F, Heeb S, Dormond C, Pessi G, Singer D, Camara M, Williams P, Haas D.  
722 2004. Positive control of swarming, rhamnolipid synthesis, and lipase production by the  
723 posttranscriptional RsmA/RsmZ system in *Pseudomonas aeruginosa* PAO1. *J Bacteriol*  
724 186:2936-2945.
- 725 19. Romero M, Silistre H, Lovelock L, Wright VJ, Chan KG, Hong KW, Williams P, Camara M,  
726 Heeb S. 2018. Genome-wide mapping of the RNA targets of the *Pseudomonas aeruginosa*  
727 riboregulatory protein RsmN. *Nucleic Acids Res* 46:6823-6840.
- 728 20. Gebhardt MJ, Kambara TK, Ramsey KM, Dove SL. 2020. Widespread targeting of nascent  
729 transcripts by RsmA in *Pseudomonas aeruginosa*. *Proc Natl Acad Sci U S A* 117:10520-10529.
- 730 21. Marden JN, Diaz MR, Walton WG, Gode CJ, Betts L, Urbanowski ML, Redinbo MR, Yahr TL,  
731 Wolfgang MC. 2013. An unusual CsrA family member operates in series with RsmA to amplify  
732 posttranscriptional responses in *Pseudomonas aeruginosa*. *Proc Natl Acad Sci U S A* 110:15055-  
733 15060.
- 734 22. Chihara K, Bischler T, Barquist L, Monzon AV, Noda N, Vogel J, Tsuneda S. 2019. Conditional  
735 Hfq association with small noncoding RNAs in *Pseudomonas aeruginosa* revealed through  
736 comparative UV cross-linking immunoprecipitation followed by high-throughput sequencing.  
737 *mSystems* 4:e00590-19.
- 738 23. Kingsford CL, Ayanbule K, Salzberg SL. 2007. Rapid, accurate, computational discovery of  
739 Rho-independent transcription terminators illuminates their relationship to DNA uptake. *Genome*  
740 *Biol* 8:R22.
- 741 24. Gill EE, Chan LS, Winsor GL, Dobson N, Lo R, Ho Sui SJ, Dhillon BK, Taylor PK, Shrestha R,  
742 Spencer C, Hancock REW, Unrau PJ, Brinkman FSL. 2018. High-throughput detection of RNA  
743 processing in bacteria. *BMC Genomics* 19:223.

- 744 25. Ferrara S, Brugnoli M, De Bonis A, Righetti F, Delvillani F, Deho G, Horner D, Briani F,  
745 Bertoni G. 2012. Comparative profiling of *Pseudomonas aeruginosa* strains reveals differential  
746 expression of novel unique and conserved small RNAs. PLoS One 7:e36553.
- 747 26. Gomez-Lozano M, Marvig RL, Molin S, Long KS. 2012. Genome-wide identification of novel  
748 small RNAs in *Pseudomonas aeruginosa*. Environ Microbiol 14:2006-2016.
- 749 27. Gomez-Lozano M, Marvig RL, Tulstrup MV, Molin S. 2014. Expression of antisense small  
750 RNAs in response to stress in *Pseudomonas aeruginosa*. BMC Genomics 15:783.
- 751 28. Schulmeyer KH, Diaz MR, Bair TB, Sanders W, Gode CJ, Laederach A, Wolfgang MC, Yahr  
752 TL. 2016. Primary and secondary sequence structure requirements for recognition and  
753 discrimination of target RNAs by *Pseudomonas aeruginosa* RsmA and RsmF. J Bacteriol  
754 198:2458-2469.
- 755 29. Sorger-Domenigg T, Sonnleitner E, Kaberdin VR, Blasi U. 2007. Distinct and overlapping  
756 binding sites of *Pseudomonas aeruginosa* Hfq and RsmA proteins on the non-coding RNA  
757 RsmY. Biochem Biophys Res Commun 352:769-773.
- 758 30. Rocchetta HL, Burrows LL, Lam JS. 1999. Genetics of O-antigen biosynthesis in *Pseudomonas*  
759 *aeruginosa*. Microbiol Mol Biol Rev 63:523-553.
- 760 31. Bordi C, Lamy MC, Ventre I, Termine E, Hachani A, Fillet S, Roche B, Bleves S, Mejean V,  
761 Lazdunski A, Filloux A. 2010. Regulatory RNAs and the HptB/RetS signalling pathways fine-  
762 tune *Pseudomonas aeruginosa* pathogenesis. Mol Microbiol 76:1427-1443.
- 763 32. Petrova OE, Sauer K. 2010. The novel two-component regulatory system BfiSR regulates  
764 biofilm development by controlling the small RNA *rsmZ* through CafA. J Bacteriol 192:5275-  
765 5288.

- 766 33. Bouillet S, Ba M, Houot L, Iobbi-Nivol C, Bordi C. 2019. Connected partner-switches control  
767 the life style of *Pseudomonas aeruginosa* through RpoS regulation. *Sci Rep* 9:6496.
- 768 34. Zuker M. 2003. Mfold web server for nucleic acid folding and hybridization prediction. *Nucleic  
769 Acids Res* 31:3406-3415.
- 770 35. Thomason MK, Voichek M, Dar D, Addis V, FitzGerald DJ, Gottesman S, Sorek R, Greenberg  
771 EP, Buchrieser C. 2019. A *rhlI* 5' UTR-derived sRNA regulates RhlR-dependent quorum sensing  
772 in *Pseudomonas aeruginosa*. *mBio* 10:43.
- 773 36. Tree JJ, Granneman S, McAteer SP, Tollervey D, Gally DL. 2014. Identification of  
774 bacteriophage-encoded anti-sRNAs in pathogenic *Escherichia coli*. *Mol Cell* 55:199-213.
- 775 37. Holmqvist E, Wright PR, Li L, Bischler T, Barquist L, Reinhardt R, Backofen R, Vogel J. 2016.  
776 Global RNA recognition patterns of post-transcriptional regulators Hfq and CsrA revealed by  
777 UV crosslinking *in vivo*. *EMBO J* 35:991-1011.
- 778 38. Potts AH, Vakulskas CA, Pannuri A, Yakhnin H, Babitzke P, Romeo T. 2017. Global role of the  
779 bacterial post-transcriptional regulator CsrA revealed by integrated transcriptomics. *Nat  
780 Commun* 8:1596.
- 781 39. Lovelock L. 2012. RsmN : a new atypical RsmA homologue in *Pseudomonas aeruginosa*. PhD  
782 thesis. Univ of Nottingham, Nottingham, United Kingdom.
- 783 40. Lee FCY, Ule J. 2018. Advances in CLIP technologies for studies of protein-RNA interactions.  
784 *Mol Cell* 69:354-369.
- 785 41. Van Nostrand EL, Pratt GA, Shishkin AA, Gelboin-Burkhart C, Fang MY, Sundararaman B,  
786 Blue SM, Nguyen TB, Surka C, Elkins K, Stanton R, Rigo F, Guttman M, Yeo GW. 2016.  
787 Robust transcriptome-wide discovery of RNA-binding protein binding sites with enhanced CLIP  
788 (eCLIP). *Nat Methods* 13:508-514.

- 789 42. Maticzka D, Ilik IA, Aktas T, Backofen R, Akhtar A. 2018. uvCLAP is a fast and non-  
790 radioactive method to identify *in vivo* targets of RNA-binding proteins. *Nat Commun* 9:1142.
- 791 43. Ilik IA, Aktas T, Maticzka D, Backofen R, Akhtar A. 2019. FLASH: ultra-fast protocol to  
792 identify RNA-protein interactions in cells. *Nucleic Acids Res* 48:e15.
- 793 44. Müller P, Gimpel M, Wildenhain T, Brantl S. 2019. A new role for CsrA: promotion of complex  
794 formation between an sRNA and its mRNA target in *Bacillus subtilis*. *RNA Biol*:1-16.
- 795 45. Olejniczak M, Storz G. 2017. ProQ/FinO-domain proteins: another ubiquitous family of RNA  
796 matchmakers? *Mol Microbiol* 104:905-915.
- 797 46. van Biesen T, Frost LS. 1994. The FinO protein of IncF plasmids binds FinP antisense RNA and  
798 its target, *traJ* mRNA, and promotes duplex formation. *Mol Microbiol* 14:427-436.
- 799 47. Smirnov A, Forstner KU, Holmqvist E, Otto A, Gunster R, Becher D, Reinhardt R, Vogel J.  
800 2016. Grad-seq guides the discovery of ProQ as a major small RNA-binding protein. *Proc Natl*  
801 *Acad Sci U S A* 113:11591-11596.
- 802 48. Smirnov A, Wang C, Drewry LL, Vogel J. 2017. Molecular mechanism of mRNA repression *in*  
803 *trans* by a ProQ-dependent small RNA. *EMBO J* 36:1029-1045.
- 804 49. Melamed S, Adams PP, Zhang A, Zhang H, Storz G. 2019. RNA-RNA interactomes of ProQ and  
805 Hfq reveal overlapping and competing roles. *Mol Cell* 77:411-425.e7.
- 806 50. Ross JA, Ellis MJ, Hossain S, Haniford DB. 2013. Hfq restructures RNA-IN and RNA-OUT and  
807 facilitates antisense pairing in the Tn10/IS10 system. *RNA* 19:670-684.
- 808 51. Pessi G, Williams F, Hindle Z, Heurlier K, Holden MT, Camara M, Haas D, Williams P. 2001.  
809 The global posttranscriptional regulator RsmA modulates production of virulence determinants  
810 and N-acylhomoserine lactones in *Pseudomonas aeruginosa*. *J Bacteriol* 183:6676-6683.

- 811 52. Duss O, Michel E, Diarra dit Konte N, Schubert M, Allain FH. 2014. Molecular basis for the  
812 wide range of affinity found in Csr/Rsm protein-RNA recognition. *Nucleic Acids Res* 42:5332-  
813 5346.
- 814 53. Burrows LL, Chow D, Lam JS. 1997. *Pseudomonas aeruginosa* B-band O-antigen chain length  
815 is modulated by Wzz (Ro1). *J Bacteriol* 179:1482-1489.
- 816 54. Deretic V, Schurr MJ, Yu H. 1995. *Pseudomonas aeruginosa*, mucoidy and the chronic infection  
817 phenotype in cystic fibrosis. *Trends in Microbiology* 3:351-356.
- 818 55. Cross AR, Goldberg JB. 2019. Remodeling of O antigen in mucoid *Pseudomonas aeruginosa* via  
819 transcriptional repression of *wzz2*. *mBio* 10:e02914-18.
- 820 56. Stacey SD, Williams DA, Pritchett CL. 2017. The *Pseudomonas aeruginosa* two-component  
821 regulator AlgR directly activates *rsmA* expression in a phosphorylation independent manner. *J*  
822 *Bacteriol* 199:e00048-17.
- 823 57. Ghafoor A, Hay ID, Rehm BH. 2011. Role of exopolysaccharides in *Pseudomonas aeruginosa*  
824 biofilm formation and architecture. *Appl Environ Microbiol* 77:5238-5246.
- 825 58. Augustin DK, Song Y, Baek MS, Sawa Y, Singh G, Taylor B, Rubio-Mills A, Flanagan JL,  
826 Wiener-Kronish JP, Lynch SV. 2007. Presence or absence of lipopolysaccharide O antigens  
827 affects type III secretion by *Pseudomonas aeruginosa*. *J Bacteriol* 189:2203-2209.
- 828 59. Huang H, Shao X, Xie Y, Wang T, Zhang Y, Wang X, Deng X. 2019. An integrated genomic  
829 regulatory network of virulence-related transcriptional factors in *Pseudomonas aeruginosa*. *Nat*  
830 *Commun* 10:2931.
- 831 60. Intile PJ, Diaz MR, Urbanowski ML, Wolfgang MC, Yahr TL. 2014. The AlgZR two-component  
832 system recalibrates the RsmAYZ posttranscriptional regulatory system to inhibit expression of  
833 the *Pseudomonas aeruginosa* type III secretion system. *J Bacteriol* 196:357-366.

- 834 61. Wang Z, Huang X, Liu Y, Yang G, Liu Y, Zhang X. 2017. GacS/GacA activates pyoluteorin  
835 biosynthesis through Gac/Rsm-RsmE cascade and RsmA/RsmE-driven feedback loop in  
836 *Pseudomonas protegens* H78. *Mol Microbiol* 105:968-985.
- 837 62. Elowitz MB, Leibler S. 2000. A synthetic oscillatory network of transcriptional regulators.  
838 *Nature* 403:335-338.
- 839 63. Chen R, Weng Y, Zhu F, Jin Y, Liu C, Pan X, Xia B, Cheng Z, Jin S, Wu W. 2016.  
840 Polynucleotide phosphorylase regulates multiple virulence factors and the stabilities of small  
841 RNAs RsmY/Z in *Pseudomonas aeruginosa*. *Front Microbiol* 7:247.
- 842 64. Janssen KH, Corley JM, Djapgne L, Cribbs JT, Voelker D, Slusher Z, Nordell R, Regulski EE,  
843 Kazmierczak BI, McMackin EW, Yahr TL. 2020. Hfq and sRNA 179 inhibit expression of the  
844 *Pseudomonas aeruginosa* cAMP-Vfr and type III secretion regulons. *mBio* 11:e00363-20.
- 845 65. Hmelo LR, Borlee BR, Almlad H, Love ME, Randall TE, Tseng BS, Lin C, Irie Y, Storek KM,  
846 Yang JJ, Siehnel RJ, Howell PL, Singh PK, Tolker-Nielsen T, Parsek MR, Schweizer HP,  
847 Harrison JJ. 2015. Precision-engineering the *Pseudomonas aeruginosa* genome with two-step  
848 allelic exchange. *Nat Protoc* 10:1820-1841.
- 849 66. Maseda H, Sawada I, Saito K, Uchiyama H, Nakae T, Nomura N. 2004. Enhancement of the  
850 *mexAB-oprM* efflux pump expression by a quorum-sensing autoinducer and its cancellation by a  
851 regulator, MexT, of the *mexEF-oprN* efflux pump operon in *Pseudomonas aeruginosa*.  
852 *Antimicrob Agents Chemother* 48:1320-1328.
- 853 67. Martin M. 2011. Cutadapt removes adapter sequences from high-throughput sequencing reads.  
854 *EMBnetjournal* 17.
- 855 68. Xu H, Luo X, Qian J, Pang X, Song J, Qian G, Chen J, Chen S. 2012. FastUniq: a fast *de novo*  
856 duplicates removal tool for paired short reads. *PLoS One* 7:e52249.

- 857 69. Forstner KU, Vogel J, Sharma CM. 2014. READemption-a tool for the computational analysis of  
858 deep-sequencing-based transcriptome data. *Bioinformatics* 30:3421-3423.
- 859 70. Hoffmann S, Otto C, Doose G, Tanzer A, Langenberger D, Christ S, Kunz M, Holdt LM,  
860 Teupser D, Hackermuller J, Stadler PF. 2014. A multi-split mapping algorithm for circular RNA,  
861 splicing, trans-splicing and fusion detection. *Genome Biol* 15:R34.
- 862 71. Holmqvist E, Li L, Bischler T, Barquist L, Vogel J. 2018. Global maps of ProQ binding *in vivo*  
863 reveal target recognition via RNA structure and stability control at mRNA 3' ends. *Mol Cell*  
864 70:971-982 e6.
- 865 72. Anders S, Huber W. 2010. Differential expression analysis for sequence count data. *Genome*  
866 *Biol* 11:R106.
- 867 73. Langenberger D, Bermudez-Santana C, Hertel J, Hoffmann S, Khaitovich P, Stadler PF. 2009.  
868 Evidence for human microRNA-offset RNAs in small RNA sequencing data. *Bioinformatics*  
869 25:2298-2301.
- 870 74. Love MI, Huber W, Anders S. 2014. Moderated estimation of fold change and dispersion for  
871 RNA-seq data with DESeq2. *Genome Biol* 15:550.
- 872 75. Bailey TL, Johnson J, Grant CE, Noble WS. 2015. The MEME Suite. *Nucleic Acids Res*  
873 43:W39-49.
- 874 76. Yao Z, Weinberg Z, Ruzzo WL. 2006. CMfinder--a covariance model based RNA motif finding  
875 algorithm. *Bioinformatics* 22:445-452.
- 876 77. Weinberg Z, Breaker RR. 2011. R2R--software to speed the depiction of aesthetic consensus  
877 RNA secondary structures. *BMC Bioinformatics* 12:3.

- 878 78. Corcoran CP, Podkaminski D, Papenfort K, Urban JH, Hinton JC, Vogel J. 2012. Superfolder  
879 GFP reporters validate diverse new mRNA targets of the classic porin regulator, MicF RNA.  
880 Mol Microbiol 84:428-445.
- 881 79. Wilton R, Ahrendt AJ, Shinde S, Sholto-Douglas DJ, Johnson JL, Brennan MB, Kemner KM.  
882 2017. A new suite of plasmid vectors for fluorescence-based imaging of root colonizing  
883 *Pseudomonads*. Front Plant Sci 8:2242.
- 884 80. Beaudoin T, Zhang L, Hinz AJ, Parr CJ, Mah TF. 2012. The biofilm-specific antibiotic  
885 resistance gene *ndvB* is important for expression of ethanol oxidation genes in *Pseudomonas*  
886 *aeruginosa* biofilms. J Bacteriol 194:3128-3136.
- 887 81. Livak KJ, Schmittgen TD. 2001. Analysis of relative gene expression data using real-time  
888 quantitative PCR and the 2<sup>-</sup>(-Delta Delta C(T)) Method. Methods 25:402-408.
- 889 82. Argaman L, Hershberg R, Vogel J, Bejerano G, Wagner EGH, Margalit H, Altuvia S. 2001.  
890 Novel small RNA-encoding genes in the intergenic regions of *Escherichia coli*. Curr Biol  
891 11:941-950.
- 892



893 **Figure legends**

894 Figure 1. Overview of RsmA/N CLIP-seq. (A) Representative figures of autoradiogram and western  
895 blotting of the CLIP-enriched RsmA/N-RNA complexes. XL+: crosslinking, XL-: non-crosslinking. (B)  
896 Graphical summary of nonRI CLIP-seq approach. (C) The distribution of RsmA/N binding sites across  
897 the *P. aeruginosa* genome. Peaks from RsmA and RsmN CLIP-seq are highlighted in blue and red,  
898 respectively. (D) Overlapping peaks and genes between RsmA and RsmN bindings. Two peaks from  
899 both RNA chaperones wherein both the start and stop positions are within 40 nt were considered as the  
900 same peak. (E) Classification of RsmA/N peaks into RNA classes (5' UTR, CDS, 3' UTR, sRNA,  
901 tRNA, rRNA and Intergenic peaks). Note that a peak may be classified into multiple classes based on its  
902 position.

903

904 Figure 2. Consensus motif for *P. aeruginosa* RsmA/N bindings. (A) Meta-gene analysis for RsmA/N  
905 bindings along mRNAs with start and stop codons as the reference points. (B) MEME sequence motif  
906 analysis for all RsmA (411) and RsmN (186) peaks. The numbers indicate the peaks containing  
907 predicted sequence motifs. (C) Percentage of peaks with indicated sequences. (D) CMfinder structural  
908 motif analysis of all RsmA (411) and RsmN (186) peak sequences extended with 10 nt upstream and  
909 downstream. Top-ranked structural motifs are shown. (E) Percentage of peaks with the indicated number  
910 of GGA sequence per peak sequence extended with 10 nt upstream and downstream.

911

912 Figure 3. RsmA/N CLIP-seq captures previously known RsmA/N-binding sites. (A) Read coverage from  
913 RsmA/N and Hfq CLIP-seq at the sRNAs RsmY/Z loci. Vertical axis indicates each read count. XL+:  
914 crosslinking, XL-: non-crosslinking. (B) Secondary structures of sRNAs RsmY/Z. Red and shaded  
915 letters indicate RsmA/N and Hfq binding peaks, respectively. Bold letters indicate GGA sequence as a

916 common binding motif of RsmA/N. (C) Read coverage at the *tssA1* and *mucA* loci from RsmA/N CLIP-  
917 seq are indicated. (D) Secondary structures of RsmA/N binding sites at the *tssA1* and *mucA* were  
918 predicted using Mfold (34). Red letters indicate GGA sequence as a common binding motif of RsmA/N.

919

920 Figure 4. The *wbp* gene cluster is posttranscriptionally regulated by RsmA/N. (A) DAVID enrichment  
921 analysis of RsmA/N peaks. The results of biological process are presented. (B) RsmA/N peak density  
922 distribution along the *P. aeruginosa* chromosome in bins of  $2 \times 10^4$  basepairs. (C) Read coverage at the  
923 *wbp* gene cluster from RsmA/N CLIP-seq. TSS annotations (black arrows) were derived from a previous  
924 study (24). Vertical axis indicates each read count. RsmA and RsmN binding peaks with significant  
925 enrichment (FDR < 0.05) are indicated as red and blue bars, respectively. The genes shown in red were  
926 used for the following translational fusion assay. (D) Super-folder GFP translational fusion assay for the  
927 indicated genes between wild type and *rsmAN* mutant. Welch's t-test results are indicated: \*,  $p$ -value <  
928 0.05; \*\*,  $p$ -value < 0.01; \*\*\*,  $p$ -value < 0.001.

929

930 Figure 5. RsmA/N-controlled feedback loop for RsmY/Z sRNAs expressions. (A) Graphical summary of  
931 RsmA/N bindings with GacAS regulatory network. Orange and purple ovals are membrane-bound  
932 histidine kinases and response regulators in two-component systems, respectively. Asterisks indicate that  
933 RsmA/N peaks are associated with the genes. (B) Read coverage at the *cafA* and *hptB* loci from  
934 RsmA/N CLIP-seq. Vertical axis indicates each read count. RsmN binding peaks with significant  
935 enrichment (FDR < 0.05) are indicated as red bars. (C) Super-folder GFP translational fusion assay for  
936 the indicated genes between wild type and *rsmAN* mutant. (D) Super-folder GFP translational fusion  
937 assay for the indicated genes in *rsmAN* mutant with indicated plasmids. For exogenous RsmA/N  
938 expressions, 0.1% arabinose was added. (E) Relative expressions of RsmY/Z in PAO1 wild type and

939 *ΔrsmA/N*. RNA was extracted from cultures at  $OD_{600} = 2.0$  and RsmY/Z abundances were quantified by  
940 qRT-PCR. Welch's t-test results are indicated: \*,  $p$ -value < 0.05; \*\*,  $p$ -value < 0.01; \*\*\*,  $p$ -value <  
941 0.001 (C and E) and One-way ANOVA and Tukey's HSD test results are indicated: \*\*,  $p$ -value < 0.01;  
942 N.S., not significant (D).

943

944 Figure 6. Representative RsmA/N-binding sRNAs. (A) Read coverage at the SPA0035, SPA0066, and  
945 SPA0079 loci from Hfq and RsmA/N CLIP-seq. (B) Secondary structures of binding sites of three  
946 sRNAs, which are extended by additional 10 nt upstream and downstream. Secondary structures were  
947 predicted using Mfold (34).

948

949 Figure S1. Detection of the 3×FLAG tagged proteins. (A) The presence of the tag was confirmed by  
950 evaluating the cell extracts at  $OD_{600} = 2.0$  obtained from PAO1 WT, *hfq::3×FLAG*, *rsmA::3×FLAG*,  
951 *rsmN::3×FLAG*, and *rsmN::3×FLAGΔrsmA* strains via western blot analysis using anti-FLAG antibody.  
952 (B) The presence of the tag was confirmed by evaluating the cell extracts at  $OD_{600} = 2.0$  obtained from  
953 PAO1 WT with pJN-*rsmN::3×FLAG* plasmid via western blot analysis using anti-FLAG antibody. The  
954 medium was supplemented with arabinose at 0.1% concentration when  $OD_{600}$  reached 0.8.

955

956 Figure S2. Venn diagram comparing the RsmA/N CLIP-seq to published data. (A) Genes with  
957 overlapping peaks between RsmA/N and Hfq. (B) Comparing the genes detected by RsmA CLIP-seq  
958 with the list of transcripts detected by ChIPPAR-seq for *P. aeruginosa* RsmA (20). (C) Comparing the  
959 genes detected by RsmN CLIP-seq with RsmN-binding genes detected by RIP-seq for *P. aeruginosa*  
960 RsmN (19).

961

962 Figure S3. Localization of RsmA/N CLIP-seq peaks relative to known or predicted coding sequences  
963 (CDSes) and ncRNAs. (A) Peaks identified in CDSes were classified according to the quadrant  
964 positions. (B) Peaks identified in ncRNAs were classified into *trans*-sRNAs and *cis*-antisense RNAs.

965

966 Figure S4. *P. aeruginosa* SPA0079 sRNA. (A) Genetic organization of the SPA0079 sRNA. The -10  
967 and -35 regions of the SPA0079 sRNA promoter are shown in bold. Transcription start site is indicated  
968 as an arrow. Underline indicates Hfq-binding site. Red letters indicate the SPA0079 sRNA sequence  
969 decided by 5'/3' RACE. Putative LasR/RhlR binding site is boxed. (B) Representative figure of 5'  
970 RACE of the SPA0079 sRNA. The band corresponding PCR product from 5' end of the SPA0079 is  
971 indicated by red arrow. Non-specific bands detected in both RppH plus and minus conditions were  
972 identified as sequences in 23S rRNA. (C) Secondary structure of SPA0079 in *P. aeruginosa* PAO1  
973 predicted by Mfold (34). Red letters indicate AUGGA sequence as a common binding motif of RsmA/N.  
974 (D) Northern blot analysis of total RNA isolated from PAO1 wild-type and  $\Delta$ SPA0079 strain. RNA was  
975 extracted at the indicated OD<sub>600</sub>. SPA0079 and 5S rRNA was detected using DIG-labelled probes.

976

977 Figure S5. Characterization of the SPA0079 sRNA. (A to C) Northern blot analysis of total RNA  
978 isolated from the indicated strains. RNA was extracted at OD<sub>600</sub> = 6.0. SPA0079 and 5S rRNA was  
979 detected using DIG-labelled probes. (D) Super-folder GFP translational fusion assay for *cafA* gene  
980 between pJNS105 control vector and pJNS-SPA0079 overexpression vector. For exogenous SPA0079  
981 expression, 0.1% arabinose was added.

982

983 Figure S6. Frequency plots of crosslinked and background samples between each replicate. The axes  
984 show read counts and the coloring shows the frequency of each x-y pair. Red line indicates  $y = x$ .

985

986 Table S1. RsmA/N peaks detected by CLIP-seq

987

988 Table S2. The list of strains, plasmids, and oligonucleotides

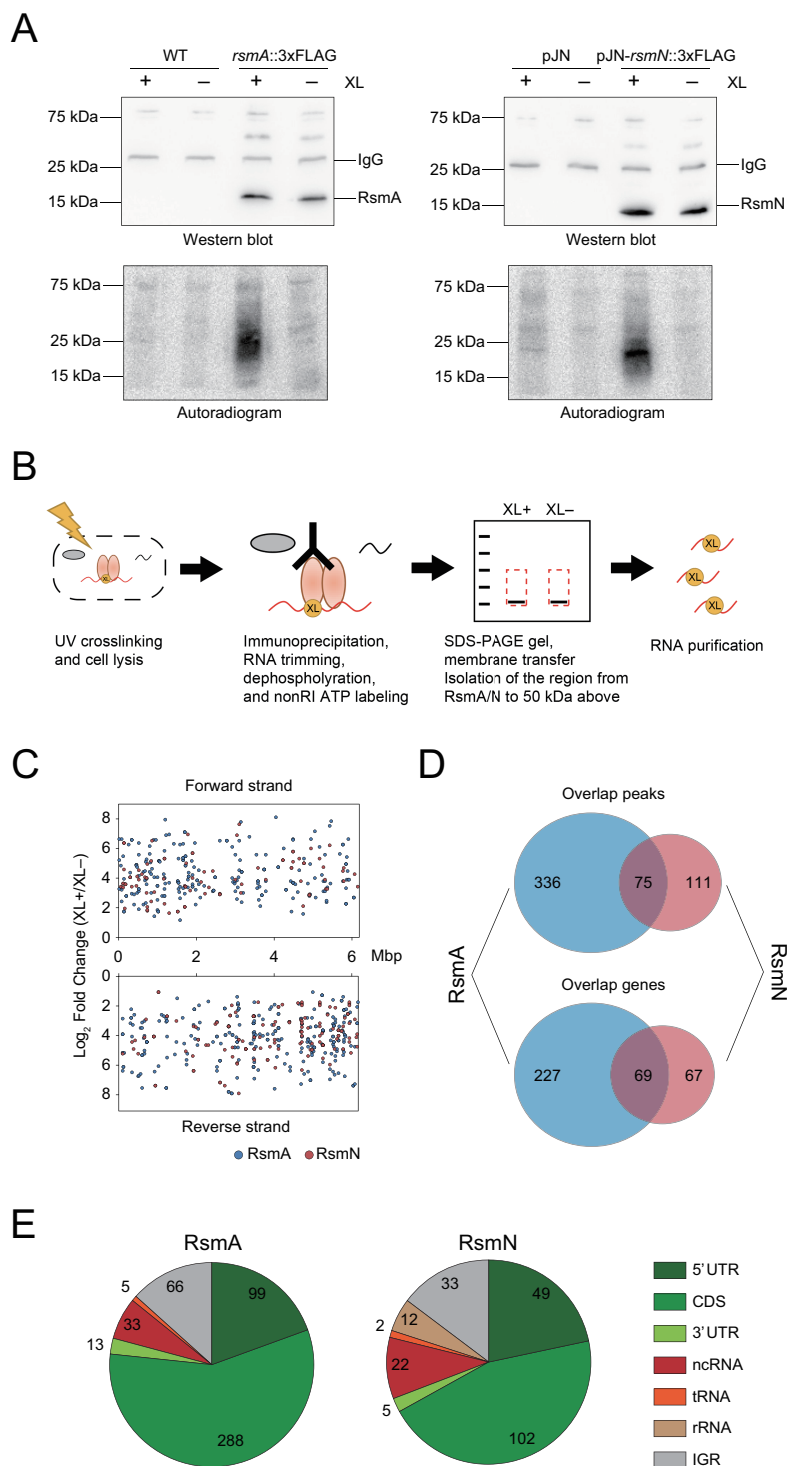

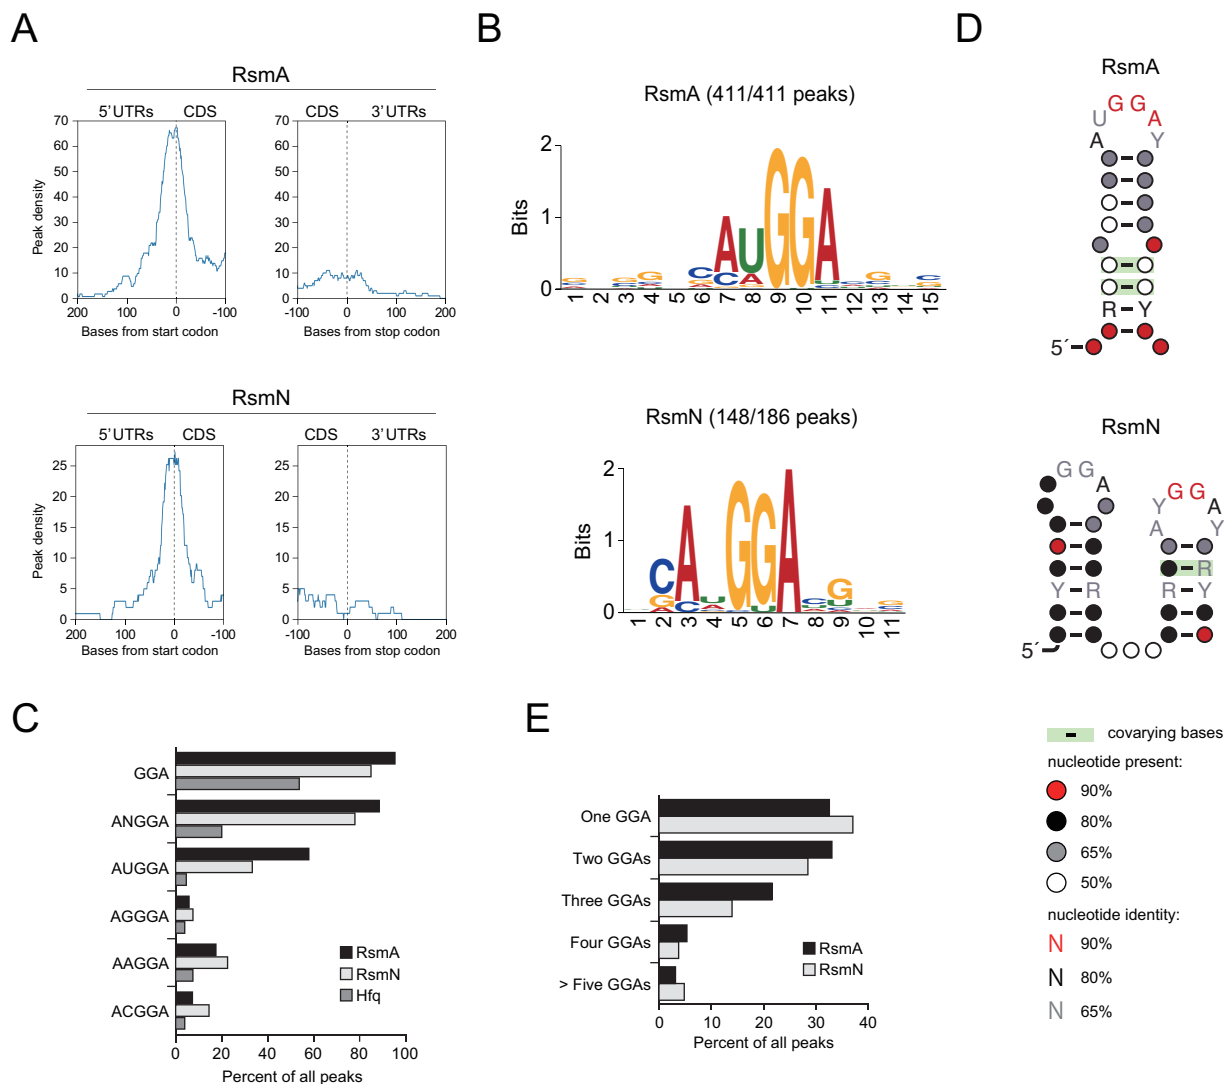

Figure 2. Consensus motif for *P. aeruginosa* RsmA/N bindings. (A) Meta-gene analysis for RsmA/N bindings along mRNAs with start and stop codons as the reference points. (B) MEME sequence motif analysis for all RsmA (411) and RsmN (186) peaks. The numbers indicate the peaks containing predicted sequence motifs. (C) Percentage of peaks with indicated sequences. (D) CMfinder structural motif analysis of all RsmA (411) and RsmN (186) peak sequences extended with 10 nt upstream and downstream. Top-ranked structural motifs are shown. (E) Percentage of peaks with the indicated number of GGA sequence per peak sequence extended with 10 nt upstream and downstream.

990

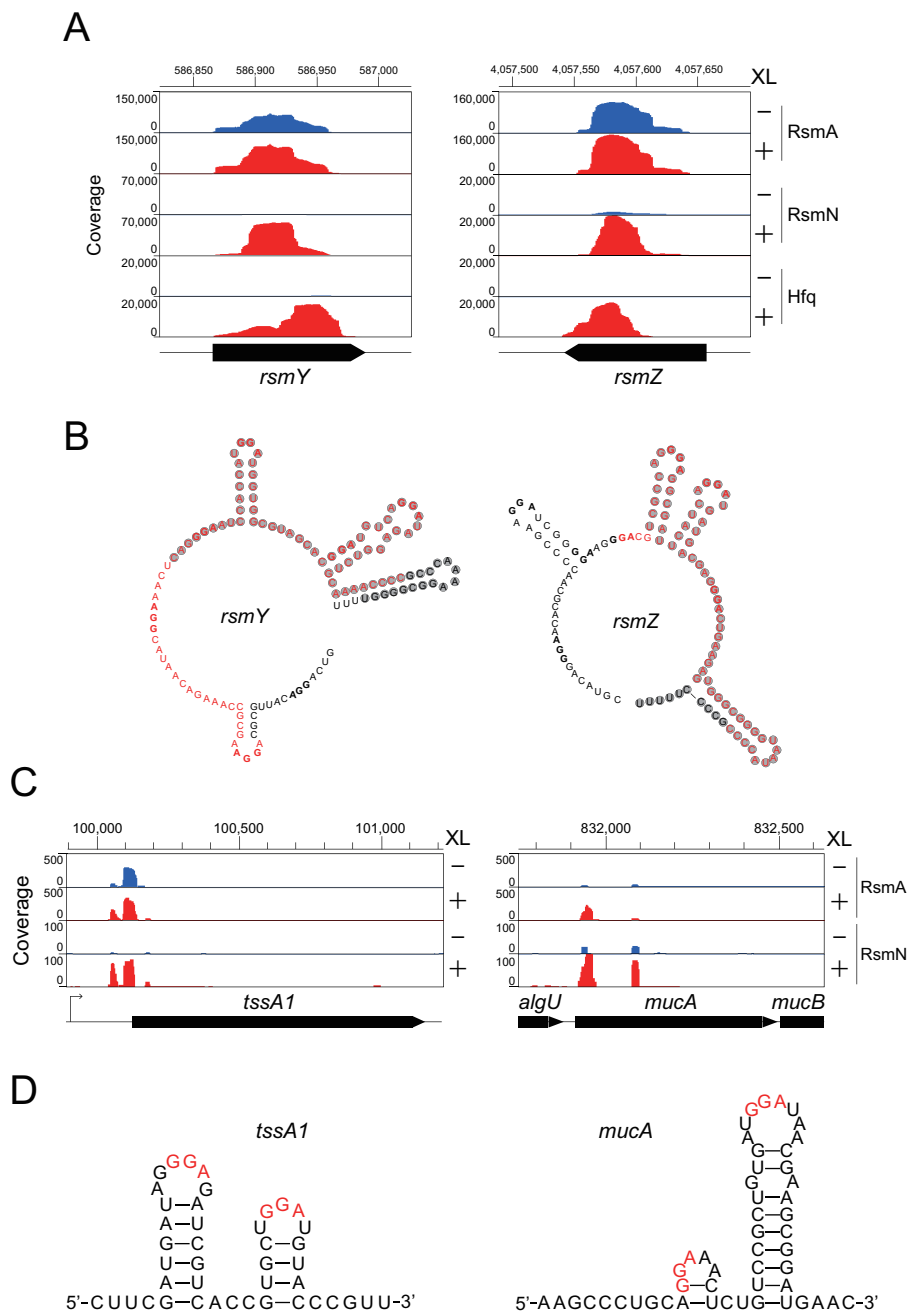

Figure 3. RsmA/N CLIP-seq captures previously known RsmA/N-binding sites. (A) Read coverage from RsmA/N and Hfq CLIP-seq at the sRNAs RsmY/Z loci. Vertical axis indicates each read count. XL+: crosslinking, XL-: non-crosslinking. (B) Secondary structures of sRNAs RsmY/Z. Red and shaded letters indicate RsmA/N and Hfq binding peaks, respectively. Bold letters indicate GGA sequence as a common binding motif of RsmA/N. (C) Read coverage at the *tssA1* and *mucA* loci from RsmA/N CLIP-seq are indicated. (D) Secondary structures of RsmA/N binding sites at the *tssA1* and *mucA* were predicted using Mfold (34). Red letters indicate GGA sequence as a common binding motif of RsmA/N.



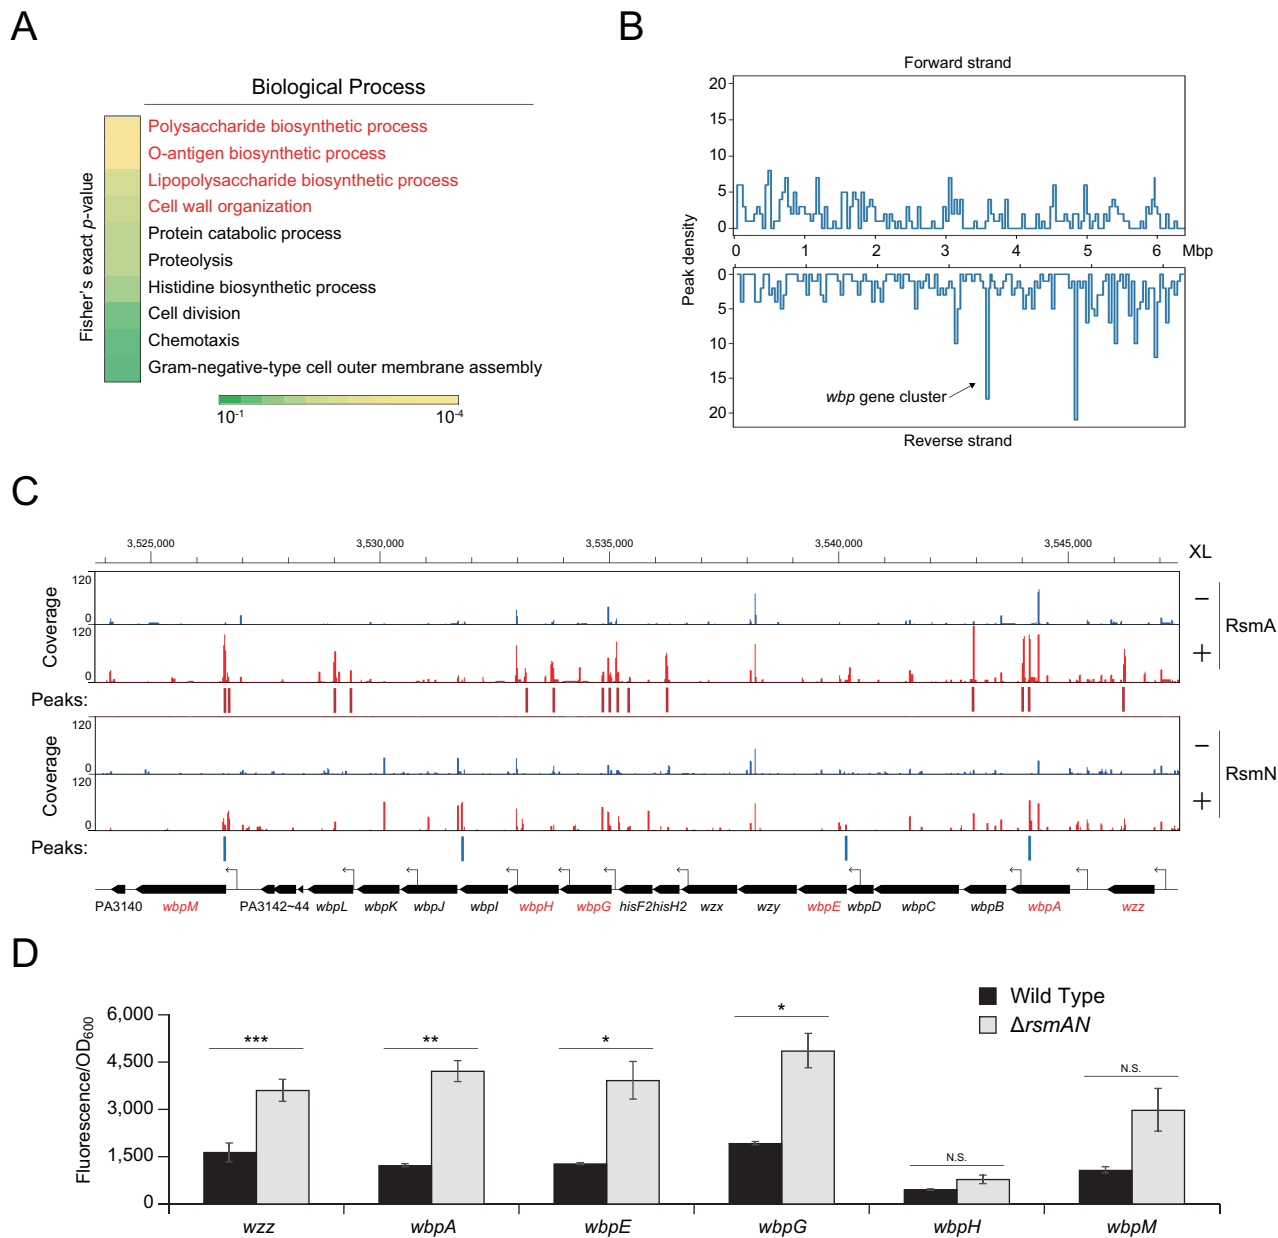

Figure 4. The *wbp* gene cluster is posttranscriptionally regulated by RsmA/N. (A) DAVID enrichment analysis of RsmA/N peaks. The results of biological process are presented. (B) RsmA/N peak density distribution along the *P. aeruginosa* chromosome in bins of  $2 \times 10^4$  basepairs. (C) Read coverage at the *wbp* gene cluster from RsmA/N CLIP-seq. TSS annotations (black arrows) were derived from a previous study (24). Vertical axis indicates each read count. RsmA and RsmN binding peaks with significant enrichment (FDR < 0.05) are indicated as red and blue bars, respectively. The genes shown in red were used for the following translational fusion assay. (D) Super-folder GFP translational fusion assay for the indicated genes between wild type and *rsmAN* mutant. Welch's t-test results are indicated: \*, p-value < 0.05; \*\*, p-value < 0.01; \*\*\*, p-value < 0.001.

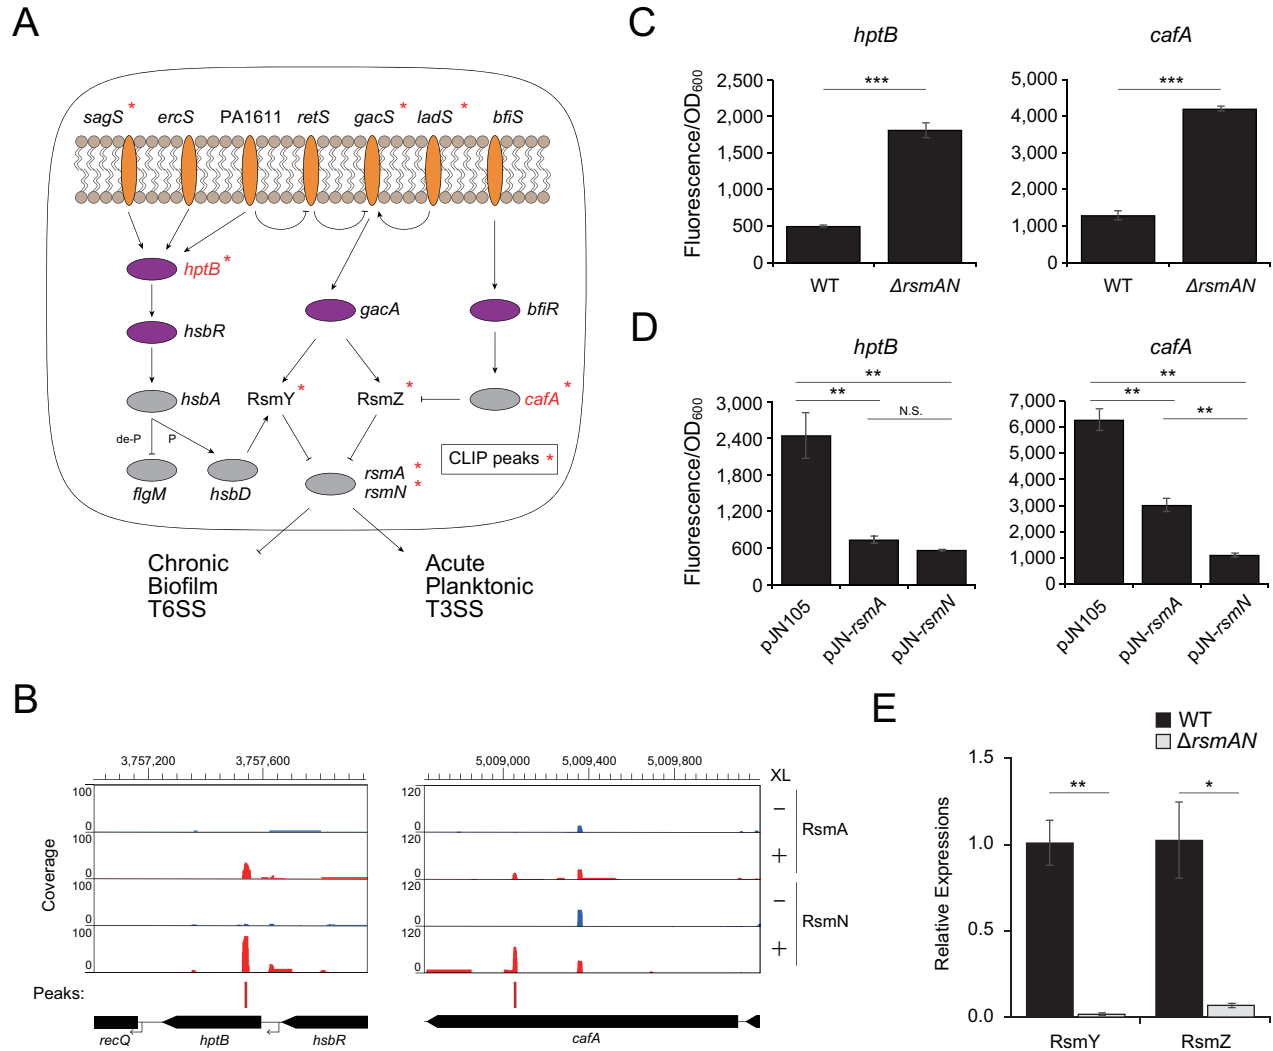

Figure 5. RsmA/N-controlled feedback loop for RsmY/Z sRNAs expressions. (A) Graphical summary of RsmA/N bindings with GacAS regulatory network. Orange and purple ovals are membrane-bound histidine kinases and response regulators in two-component systems, respectively. Asterisks indicate that RsmA/N peaks are associated with the genes. (B) Read coverage at the *cafA* and *hptB* loci from RsmA/N CLIP-seq. Vertical axis indicates each read count. RsmN binding peaks with significant enrichment (FDR < 0.05) are indicated as red bars. (C) Super-folder GFP translational fusion assay for the indicated genes between wild type and *rsmAN* mutant. (D) Super-folder GFP translational fusion assay for the indicated genes in *rsmAN* mutant with indicated plasmids. For exogenous RsmA/N expressions, 0.1% arabinose was added. (E) Relative expressions of RsmY/Z in PAO1 wild type and  $\Delta rsmA/N$ . RNA was extracted from cultures at  $OD_{600} = 2.0$  and RsmY/Z abundances were quantified by qRT-PCR. Welch's t-test results are indicated: \*, p-value < 0.05; \*\*, p-value < 0.01; \*\*\*, p-value < 0.001 (C and E) and One-way ANOVA and Tukey's HSD test results are indicated: \*\*, p-value < 0.01; N.S., not significant (D).

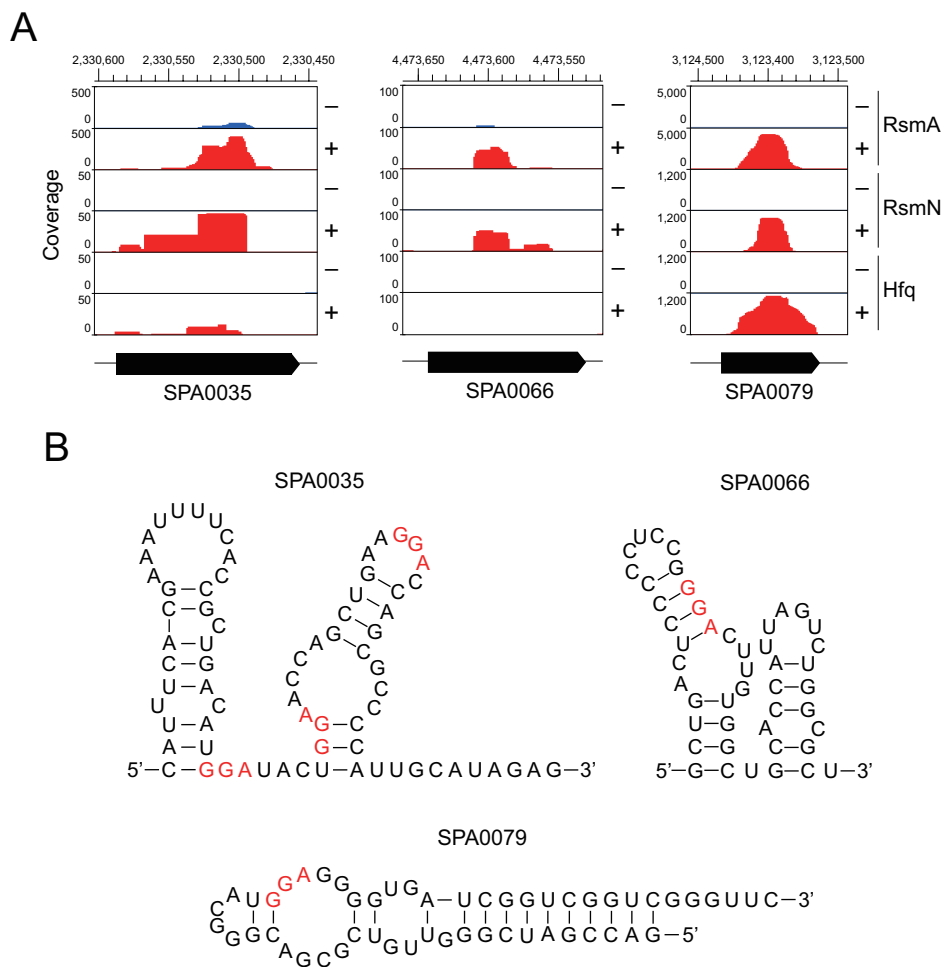

Figure 6. Representative RsmA/N-binding sRNAs. (A) Read coverage at the SPA0035, SPA0066, and SPA0079 loci from Hfq and RsmA/N CLIP-seq. (B) Secondary structures of binding sites of three sRNAs, which are extended by additional 10 nt upstream and downstream. Secondary structures were predicted using Mfold (34).

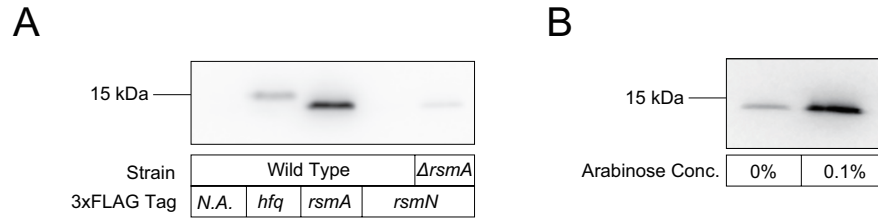

Figure S1. Detection of the 3×FLAG tagged proteins. (A) The presence of the tag was confirmed by evaluating the cell extracts at  $OD_{600} = 2.0$  obtained from PAO1 WT, *hfq*::3×FLAG, *rsmA*::3×FLAG, *rsmN*::3×FLAG, and *rsmN*::3×FLAG  $\Delta rsmA$  strains via western blot analysis using anti-FLAG antibody. (B) The presence of the tag was confirmed by evaluating the cell extracts at  $OD_{600} = 2.0$  obtained from PAO1 WT with pJN-*rsmN*::3×FLAG plasmid via western blot analysis using anti-FLAG antibody. The medium was supplemented with arabinose at 0.1% concentration when  $OD_{600}$  reached 0.8.

995

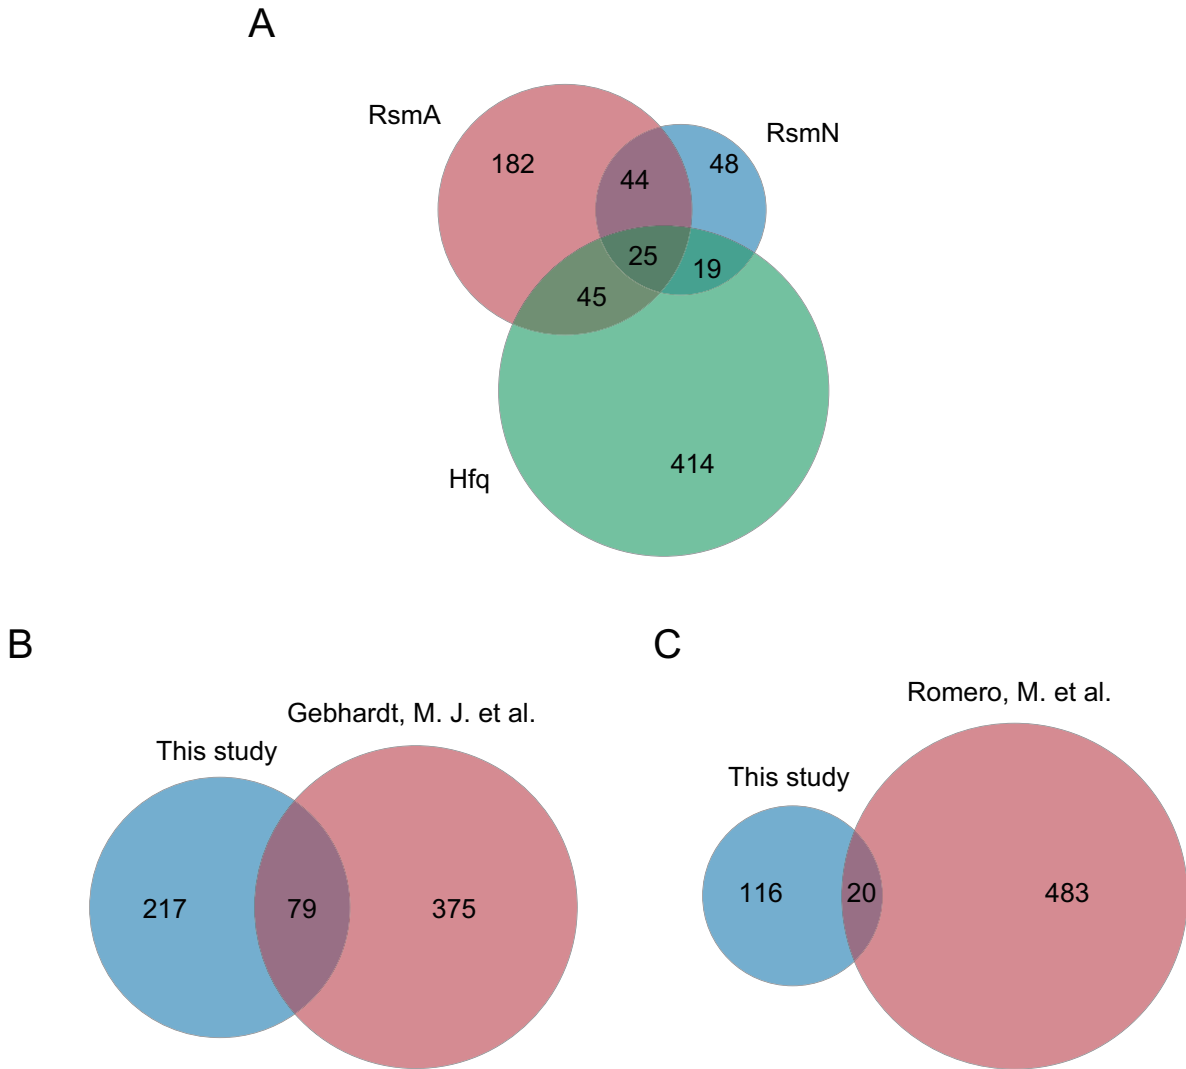

Figure S2. Venn diagram comparing the RsmA/N CLIP-seq to published data. (A) Genes with overlapping peaks between RsmA/N and Hfq. (B) Comparing the genes detected by RsmA CLIP-seq with the list of transcripts detected by ChIPPAR-seq for *P. aeruginosa* RsmA (20). (C) Comparing the genes detected by RsmN CLIP-seq with RsmN-binding genes detected by RIP-seq for *P. aeruginosa* RsmN (19).

996

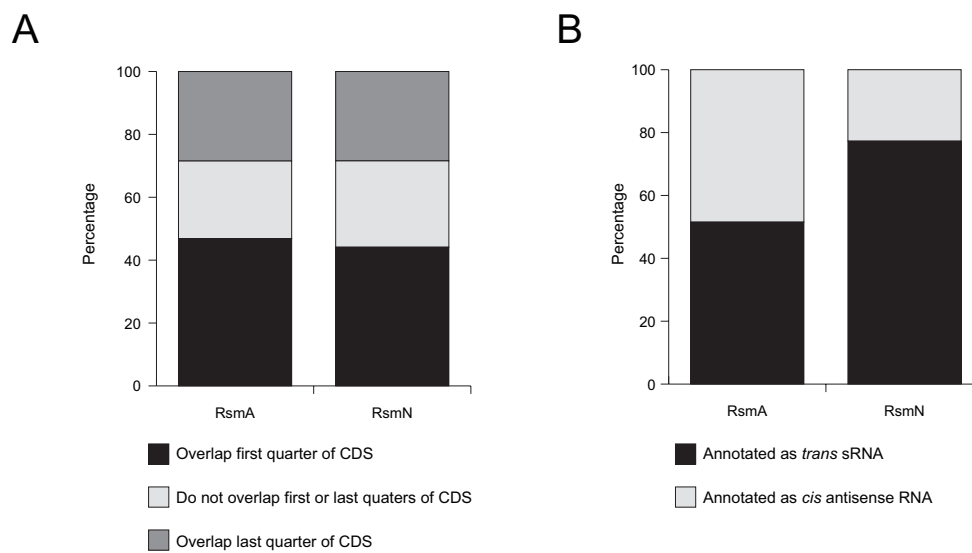

Figure S3. Localization of RsmA/N CLIP-seq peaks relative to known or predicted coding sequences (CDSes) and ncRNAs. (A) Peaks identified in CDSes were classified according to the quadrant positions. (B) Peaks identified in ncRNAs were classified into trans-sRNAs and cis-antisense RNAs.

997

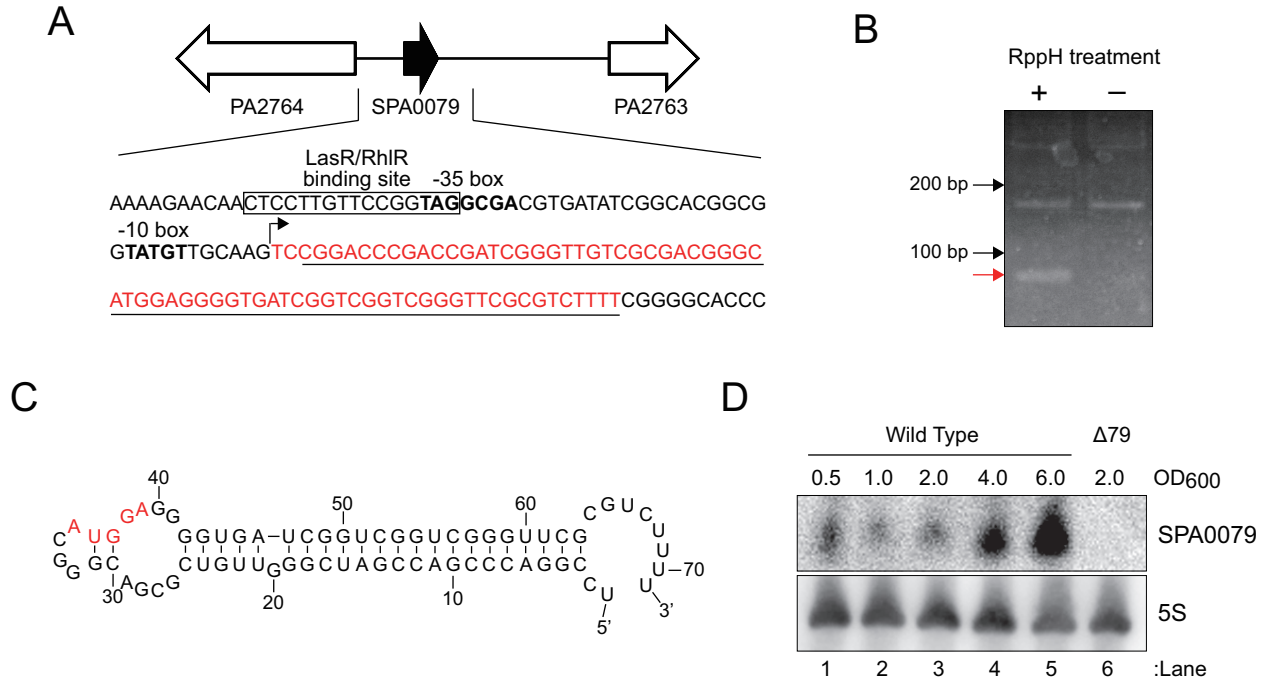

Figure S4. *P. aeruginosa* SPA0079 sRNA. (A) Genetic organization of the SPA0079 sRNA. The -10 and -35 regions of the SPA0079 sRNA promoter are shown in bold. Transcription start site is indicated as an arrow. Underline indicates Hfq-binding site. Red letters indicate the SPA0079 sRNA sequence decided by 5' /3' RACE. Putative LasR/RhlR binding site is boxed. (B) Representative figure of 5' RACE of the SPA0079 sRNA. The band corresponding PCR product from 5' end of the SPA0079 is indicated by red arrow. Non-specific bands detected in both RppH plus and minus conditions were identified as sequences in 23S rRNA. (C) Secondary structure of SPA0079 in *P. aeruginosa* PAO1 predicted by Mfold (34). Red letters indicate AUGGA sequence as a common binding motif of RsmA/N. (D) Northern blot analysis of total RNA isolated from PAO1 wild-type and  $\Delta$ SPA0079 strain. RNA was extracted at the indicated OD600. SPA0079 and 5S rRNA was detected using DIG-labelled probes.

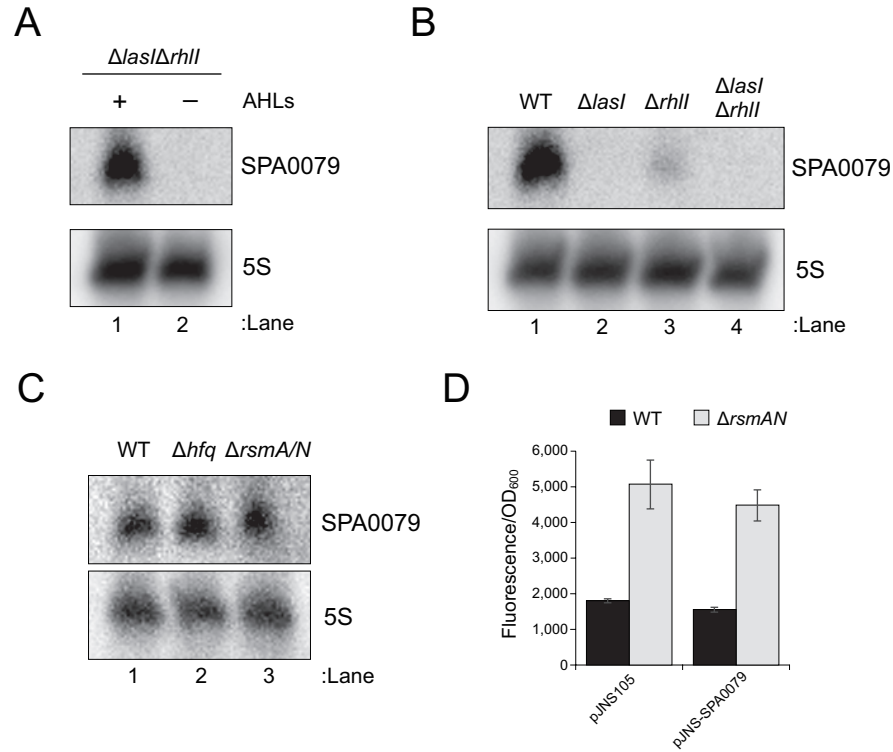

Figure S5. Characterization of the SPA0079 sRNA. (A to C) Northern blot analysis of total RNA isolated from the indicated strains. RNA was extracted at OD<sub>600</sub> = 6.0. SPA0079 and 5S rRNA was detected using DIG-labelled probes. (D) Super-folder GFP translational fusion assay for *cafA* gene between pJNS105 control vector and pJNS-SPA0079 overexpression vector. For exogenous SPA0079 expression, 0.1% arabinose was added.

999



### RsmA CLIP-seq

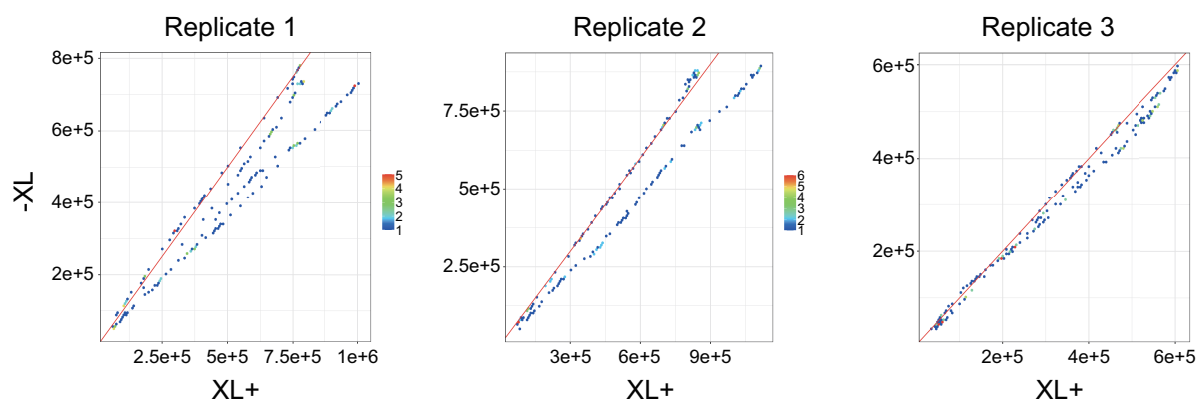

### RsmN CLIP-seq

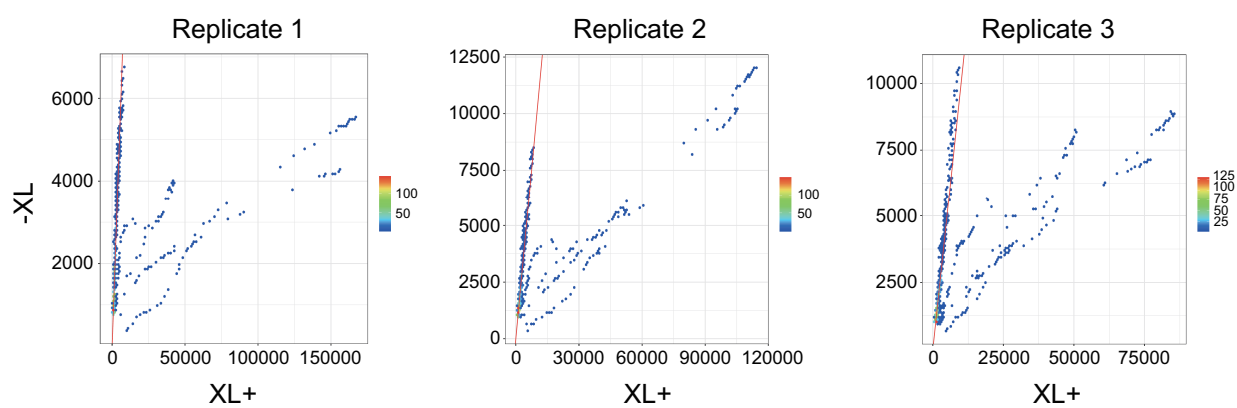

Figure S6. Frequency plots of crosslinked and background samples between each replicate. The axes show read counts and the coloring shows the frequency of each x-y pair. Red line indicates  $y = x$ .

1000
